# Supplementary material for: Superstructure optimization for management of low-density polyethylene plastic waste
Source: Royal Society of Chemistry journal article supplement (doi:10.1039/d4gc00339j), 2024-01-01
Supplement: d4gc00339j1.pdf [file d4gc00339j1.pdf]

**SUPPLEMENTARY MATERIAL: SUPERSTRUCTURE OPTIMIZATION FOR  
MANAGEMENT OF LOW-DENSITY POLYETHYLENE PLASTIC WASTE.**

*Borja Hernández, D.G. Vlachos, Marianthi G. Ierapetritou*

*Department of Chemical and Biomolecular Engineering and Center for Plastics  
Innovation, University of Delaware, 221 Academy Street, Suite 250, Newark, Delaware  
19716, USA.*

**Index:**

**S-1. Description of the Models for the Technologies.**

**S-2. General Assumptions in the Techno-economic Analysis.**

**S-3. General Assumptions in the Life Cycle Assessment.**

**S-4. Model Formulation.**

**S-5 Detailed Results**

Number of Pages: 56

Number of Tables: 63

Number of Figures: 35

## S-1. DESCRIPTION OF MODELS FOR THE TECHNOLOGIES

### S-1.1 Landfill

The first and simplest option in the superstructure is sending the plastic to a landfill. The cost for this case is assumed to be the same as the one reported for Municipal Solid Waste (MSW). The average cost in US per ton of MSW is \$53/ton.<sup>1</sup> The GWP of the landfill is assumed as the one of "Treatment of waste plastic mixture, unsanitary landfill, moist infiltration class (300 mm)".

### S-1.2 Incineration

Incineration is composed of three sections, see Figure S-1. First, the plastic is cut with a shredder then is burnt in a furnace which is used for generating steam and producing power in the last section. The operating cost in the shredder is determined as a function of the power consumed based on Larrain et al.<sup>2</sup> The following linear model, Eq. (S-1), is determined based on the data of the paper.

$$W_{shredder} \left( \frac{kWh}{s} \right) = 3.482 \cdot 10^{-2} f_{LDPE} \left( \frac{kg}{s} \right) \quad (S-1)$$

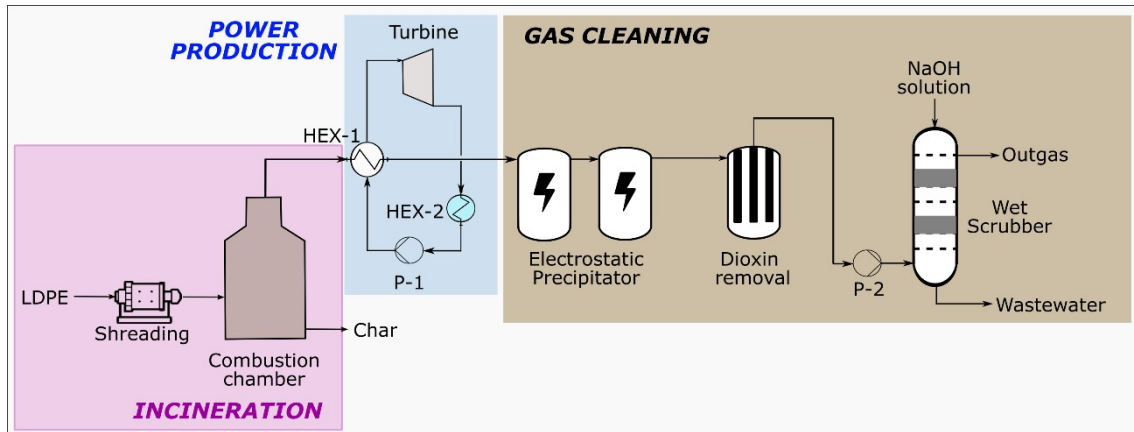

**Figure S-1.** Process for the production of power.

The energy produced in the incineration is determined as in Bora et al.<sup>3</sup> with the energy efficiency in the production of power from MSW ( $\eta_{incin} = 30\%$ ) based on the process presented in Pavlas,<sup>4</sup> see Eq. (S-2). The total energy input in the incineration,  $E_{in}$ , is determined from the energy balance of the combustion reaction, Eq. (S-3). By performing the mass and energy balances, the energy produced per kg of LDPE is estimated as presented in Eq. (S-4).

$$W_{prod\ incin} = E_{in} \cdot \eta_{incin} \quad (S-2)$$

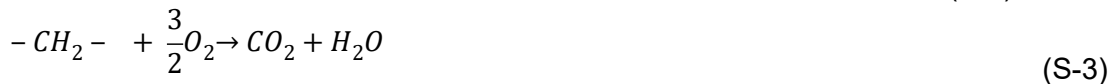

$$W_{prod\ incin} \left( \frac{kWh}{s} \right) = 12531.8 \cdot f_{LDPE} \left( \frac{kg}{s} \right) \quad (S-4)$$

The cost of units is determined as the summation of the shredder, the furnace, the heat exchanger used to boil the water, and the turbine. All the costs are determined with the cost estimator tool of the book of Peters et al.<sup>5</sup> The final CAPEX obtained for the process is implemented as the piecewise linear model generated from Eq. (S-5).

$$CAPEX \left( \frac{\$}{s} \right) = 0.09013 \cdot f_{LDPE}^{0.8257} \quad (S-5)$$

### S-1.3 Pretreatment for plastic recycling

Mass and energy balances of the pretreatment are performed following the process described in Larrain et al.,<sup>2</sup> see Figure S-2. The OPEX is determined to include the utilities and chemicals used for cleaning the plastics. A summary of the utilities and chemicals required per kg of LDPE treated is given in Table S-1, taken from Larrain et al.<sup>2</sup>

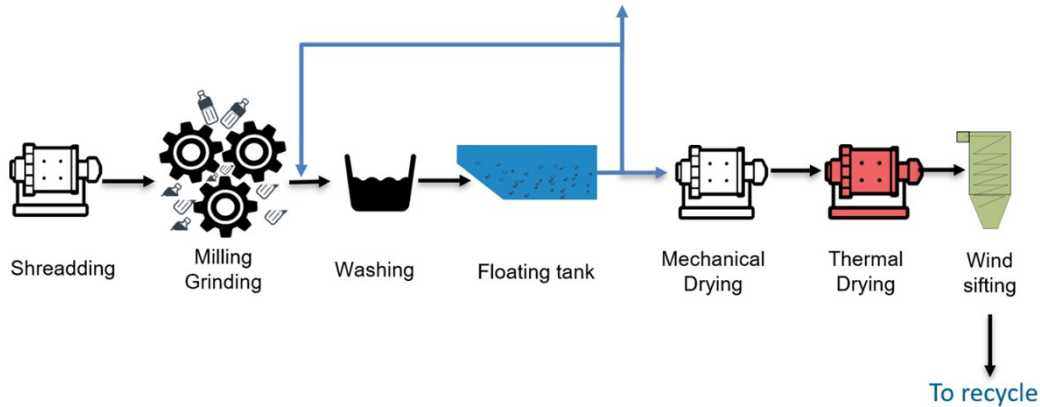

**Figure S-2.** Pre-processing of the plastics.

**Table S-1.** Summary of resources required in the plastic treatment and sorting plant.

| Utility / Raw material                             | Consumption                                | Price                      | Cost (\$/kg <sub>LDPE</sub> )          |
|----------------------------------------------------|--------------------------------------------|----------------------------|----------------------------------------|
| Water (kg/kg <sub>LDPE</sub> )                     | 2.45                                       | $2.1 \cdot 10^{-6}$ \$/kg  | $5.145 \cdot 10^{-6}$                  |
| Heat                                               | 602 kJ/kg <sub>LDPE</sub>                  | $9.95 \cdot 10^{-6}$ \$/kJ | $4.74 \cdot 10^{-3}$                   |
| Electricity                                        | 724 kJ/kg <sub>LDPE</sub>                  | 7.6 c/kWh                  | $1.53 \cdot 10^{-2}$                   |
| FeCl <sub>3</sub>                                  | 0.021 kg/kg <sub>LDPE</sub>                | 0.7\$/kg                   | $1.55 \cdot 10^{-2}$                   |
| NaOH                                               | 0.0284 kg/kg <sub>LDPE</sub>               | 0.626\$/kg                 | $1.78 \cdot 10^{-2}$                   |
| Polyelectrolyte, assumed to be starch <sup>a</sup> | $2.68 \cdot 10^{-3}$ kg/kg <sub>LDPE</sub> | 0.629\$/kg                 | $1.68 \cdot 10^{-3}$                   |
| <b>TOTAL</b>                                       |                                            |                            | <b><math>5.50 \cdot 10^{-2}</math></b> |

<sup>a</sup>Starch is a polyelectrolyte use in water purification.<sup>6</sup>

The CAPEX is determined following the cost estimator tool of Peters<sup>5</sup> for most of the units. Only the washer<sup>7</sup> and thermal dryers<sup>8</sup> are estimated with the cost provided by industrial vendors and are scaled-up with a six-tenth rule.<sup>9</sup> The overall CAPEX as a function of the scale is computed as presented in Eq. (S-6).

$$CAPEX \left( \frac{\$}{s} \right) = 0.0039 \cdot f_{LDPE} \left( \frac{kg}{s} \right)^{0.65527} \quad (S-6)$$

### S-1.4 Mechanical recycling

Mechanical recycling only requires adding one extruder after the pretreatment of the plastic. The electricity and heat requirements of the extruder are computed following Larrain et al.,<sup>2</sup> obtaining the OPEX given in Eq. (S-7). The overall plant cost (pretreatment+extruder) is determined with the cost estimator of (2). The CAPEX is estimated as presented in Eq. (S-8).

$$OPEX \left( \frac{\$}{s} \right) = 4.8286 \cdot 10^{-3} \cdot f_{LDPE} \left( \frac{kg}{s} \right) \quad (S-7)$$

$$CAPEX \left( \frac{\$}{s} \right) = 0.01113 \cdot f_{LDPE}^{0.8202} \quad (S-8)$$

### S-1.5 Gasification

LDPE gasification can be carried out with several gasifying agents (e.g. air, steam). Following the review paper of Lopez et al.<sup>10</sup> one of the processes with highest yields is obtained by a fluidized bed with olivine as a heat transfer solid in the bed. The yields used for modeling the reactor are taken from Arena et al.<sup>11</sup> Two process alternatives are modeled with Aspen Plus as presented in Figure S-3 and Figure S-4. In the Aspen Plus simulation, PolyNRTL package is employed for the properties of the components. In this package we modify the LDPE heat capacities in solid and liquid form with reports in the literature,<sup>12,13</sup> and the formation enthalpy is taken from the National Bureau of Standards.<sup>14</sup> The first process (Figure S-3) focuses on the production of H<sub>2</sub> and syngas from LDPE, and it has 2 alternatives depending on the use of H<sub>2</sub>. In the first process H<sub>2</sub> is separated by a PSA<sup>15</sup> obtaining a pure product and the remaining stream is used for producing power to be used as energy recovery in the system. In the second case, all the H<sub>2</sub> can be burnt into a turbine to produce power. The OPEX, product, and CAPEX are given in Table S-2.

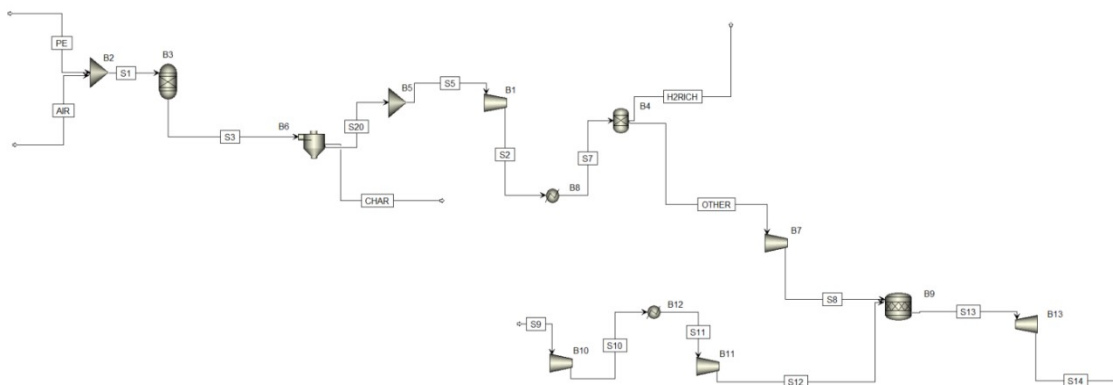

**Figure S-3.** Gasification to produce H<sub>2</sub> and power.

Another alternative process employs reforming<sup>16</sup> for transforming the hydrocarbons formed in the gasification to increase the yield to H<sub>2</sub> or syngas. The process is presented in Figure S-4.

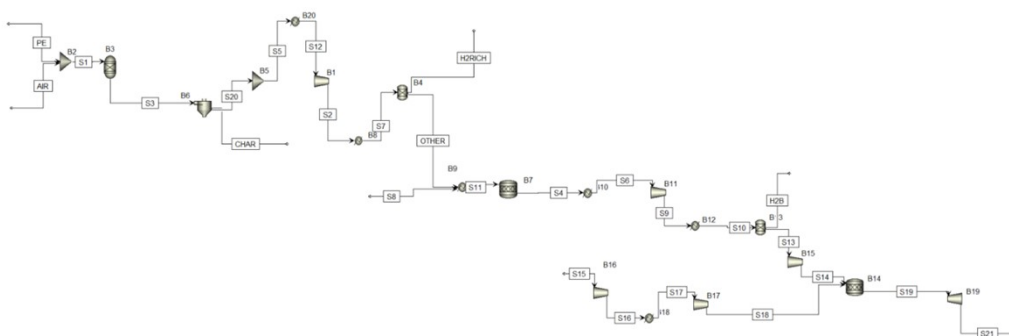

**Figure S-4.** Intensified process to produce H<sub>2</sub> followed by reforming and water gas shift.

Previous gasification uses consider only power, syngas, and hydrogen as finished products. However, the syngas produced can also be used to synthesize several components (e.g. methanol, ethanol, DME, fuels by Fischer-Tropsch).<sup>17,18</sup> The production of fuels is less competitive and more emission-intensive than other direct methods of production such as hydrothermal liquefaction. Thus, for comparison and selection of a finished product, the process is constrained to the production of methanol. Methanol production requires removing the N<sub>2</sub> and unreacted hydrocarbons produced in the reformer by means of a bed. Then, the syngas is sent to the synthesis and separation sections presented in Figure S-5. The methanol synthesis reactor is modeled at 200°C and 50 bar using the conversions given in Hernández and Martín.<sup>19</sup>

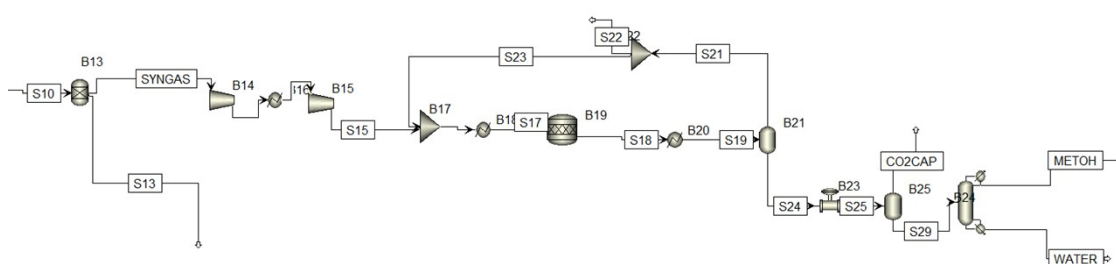

**Figure S-5.** Production of methanol from gasification and synthesis.

**Table S-2.** Comparison of process yields and CAPEX functions. In the CAPEX,  $y$  is the CAPEX in (\$/s), and  $F$  is the flowrate of the inlet in (kg/s).

| Process                                      | OPEX<br>(\$/kg <sub>LDPE</sub> ) | Product Yield (per<br>kg of LDPE) | CAPEX ( $y=a \cdot F^b$ ) |        |
|----------------------------------------------|----------------------------------|-----------------------------------|---------------------------|--------|
|                                              |                                  |                                   | a                         | b      |
| Gasification to H <sub>2</sub>               | 0.01581                          | 0.089222 (kgH <sub>2</sub> )      | 0.177                     | 0.9037 |
| Gasification and Reforming of H <sub>2</sub> | 0.01131                          | 0.091253 (kgH <sub>2</sub> )      | 0.2432                    | 0.8887 |
| Gasification to Power                        | -                                | 2.721 (MW)                        | 0.03325                   | 0.9474 |
| Gasification to MetOH                        | 0.06385                          | 1.1975 (kg of MetOH)              | 0.2538                    | 0.8402 |

### **S-1.6 Hydrothermal liquefaction**

Hydrothermal liquefaction is another high-temperature technology that produces a mixture of paraffins with an adequate octane ratio by reacting the LDPE with water at high temperatures. The reactor is modeled as a stoichiometric reactor following the distribution given by Jin et al.<sup>20</sup> The product is first separated from the water in a decanter. Then, it is sent to a fractionation column where it is separated into diesel, gasoline, and LPG, see Figure S-6. The summary with the OPEX, production rates, and CAPEX is given in Table S-3.

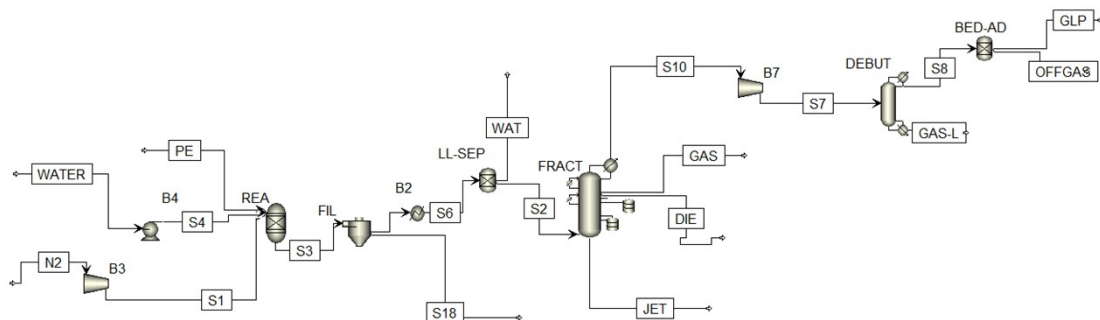

**Figure S-6.** Production of GLP, gasoline, diesel, and jet fuel from LDPE via HTL.

**Table S-3.** Summary of yields, OPEX, and CAPEX for HTL process.

| Product type | Product Yield (Kg/kgLDPE) | OPEX     | CAPEX  |       |
|--------------|---------------------------|----------|--------|-------|
|              |                           |          | a      | b     |
| GLP          | 9.04E-02                  | 0.192953 | 0.0417 | 0.564 |
| Gasoline     | 3.23E-01                  |          |        |       |
| Diesel       | 3.00E-01                  |          |        |       |
| Jet fuel     | 2.25E-01                  |          |        |       |

### S-1.7 Hydrocracking

Hydrocracking is modeled following the work of Liu et al.<sup>21</sup> The process operates at mild temperatures, 250°C, and 1 atm, and it requires the use of H<sub>2</sub> for cracking the LDPE, and it has higher selectivity to produce paraffin carbons in the range of a gasoline fraction. Paraffins are separated into several fractions using distillation columns, as given in Figure S-7. H<sub>2</sub> is a valuable component that is recovered by a PSA membrane placed after the separation of the hydrocarbons. A summary of the operating costs, yields, and CAPEX is given in Table S-4.

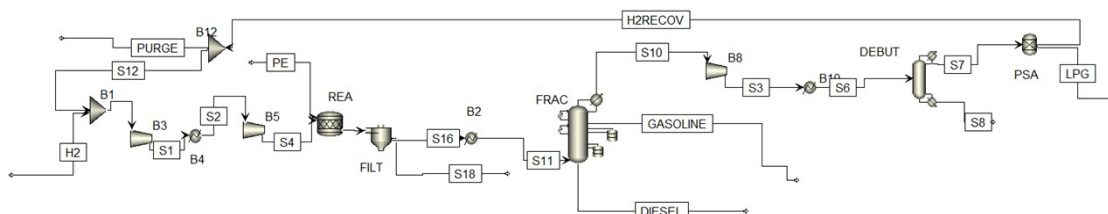

**Figure S-7.** Model for the hydrocracking process.

**Table S-4.** Summary of yields, OPEX, and CAPEX for the hydrocracking process.

| Product type | Product Yield (Kg/kgLDPE) | OPEX     | CAPEX |        |
|--------------|---------------------------|----------|-------|--------|
|              |                           |          | a     | b      |
| GLP          | 0.101375                  | 0.100488 | 0.031 | 0.5818 |
| Gasoline     | 0.722                     |          |       |        |
| Diesel       | 0.039                     |          |       |        |

### S-1.8 Hydrogenolysis

Hydrogenolysis is modeled by following the distribution of components and operating conditions reported in the work of Wang et al.<sup>22</sup> The technology works in mild conditions of temperature and pressure leading to a wide range of hydrocarbons (mixture of

paraffins and olefins from C1 to C30), but with a higher selectivity to C30's, which can be used as lubricants. The separation of hydrocarbons is performed employing a fractionation column and a debutanizer. The hydrocarbons that are not recovered in the debutanizer are finally burnt to produce power. The process is given in Figure S-8. The operating costs, yields to the products, and CAPEX values are summarized in Table S-5.

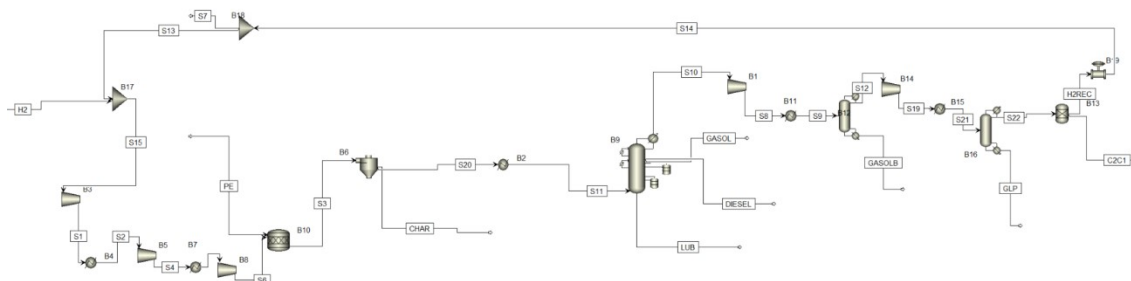

**Figure S-8.** Hydrogenolysis of LDPE.

**Table S-5.** Summary of yields, OPEX, and CAPEX for Hydrogenolysis process.

| Product type | Product Yield<br>(Kg/kgLDPE) | OPEX     | CAPEX   |        |
|--------------|------------------------------|----------|---------|--------|
|              |                              |          | a       | b      |
| Lubes        | 0.1903                       | 0.047845 | 0.10026 | 0.5179 |
| Diesel       | 0.2000                       |          |         |        |
| Gasoline     | 0.1981                       |          |         |        |
| GLP          | 0.0585                       |          |         |        |

### **S-1.9 Pyrolysis**

Pyrolysis is modeled following our previous work.<sup>23</sup> Two types of reactors are considered, a fluidized bed reactor and a MW slurry pyrolysis reactor. The fluidized bed is described in Zhao et al.,<sup>24</sup> where the reactor operates at 550°C. The MW slurry pyrolysis reactor has shown a high selectivity to olefins that can be transformed into a wide range of highly value-added products. The first part of the overall processing is the reactor and removal of the impurities. The pyrolysis takes place at 370 °C and 1 atm with a conversion of 92%.<sup>25</sup> The unreacted product is removed by filtration. The product is then cooled down at 30°C followed by the separations processes. See this part of the process in Figure S-9. The operating costs and material produced are summarized in Table S-6. Due to the importance of these products and the costs involved in producing them, a more detailed superstructure with several alternatives is studied as presented in the following section S-1.10.

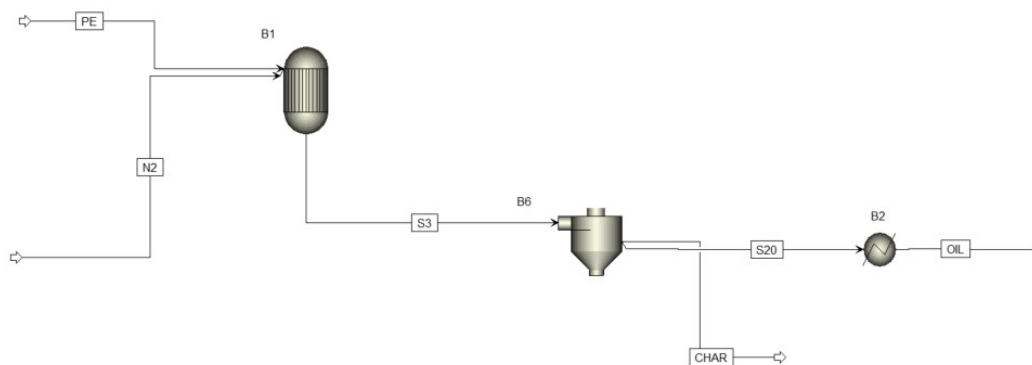

**Figure S-9.** Pyrolysis of LDPE.

**Table S-6.** Summary of consumptions and CAPEX for pyrolysis processes.

| Type                         | Consumption | CAPEX(\$/s)=a*F(kg/s)^(b) |        |
|------------------------------|-------------|---------------------------|--------|
|                              |             | a                         | b      |
| <b>MW Reactor</b>            |             |                           |        |
| N2 (kg/kg LDPE)              | 0.007       | 0.1016                    | 0.9917 |
| Power (kJ/kg)                | 2723.20     |                           |        |
| Ref (kJ/kg)                  | 2688.38     |                           |        |
| <b>Fluidized bed reactor</b> |             |                           |        |
| N2 (kg/kg LDPE)              | 0.7184      | 0.0305                    | 0.449  |
| Heat (kJ/kg)                 | 3299.64     |                           |        |
| Ref (kJ/kg)                  | 1975.57     |                           |        |

**S-1.10 Summary of the downstream products obtained by pyrolysis.**

There is a wide range of products that can be generated from olefins. The first decision taken in the process is the selection of an oligomerization process to produce higher  $\alpha$ -olefins or the separation of the olefins into the different fractions.  $\alpha$ -olefins can be later used to produce lubricants in the production of linear alkyl benzene (LAB), a surfactant. On the other hand, a detailed separation for each of the components can lead to a multiple set of products. A summary of all the separation alternatives is given in Figure S-10 and Figure S-11.



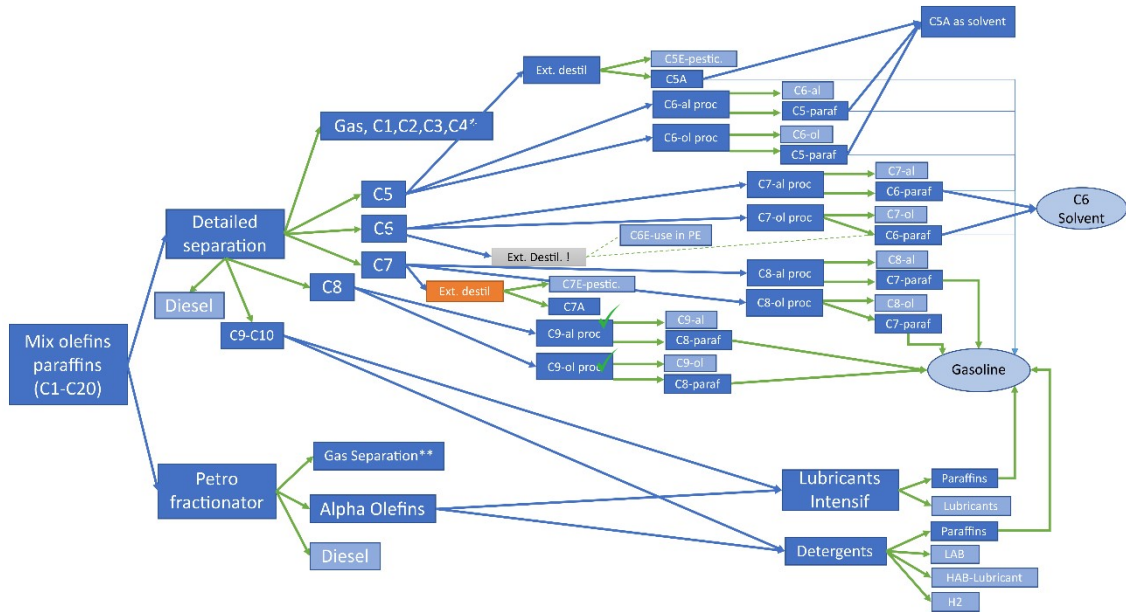

**Figure S-10.** Alternatives for the use of the naphtha from pyrolysis. Alternatives for the heavy fractions.

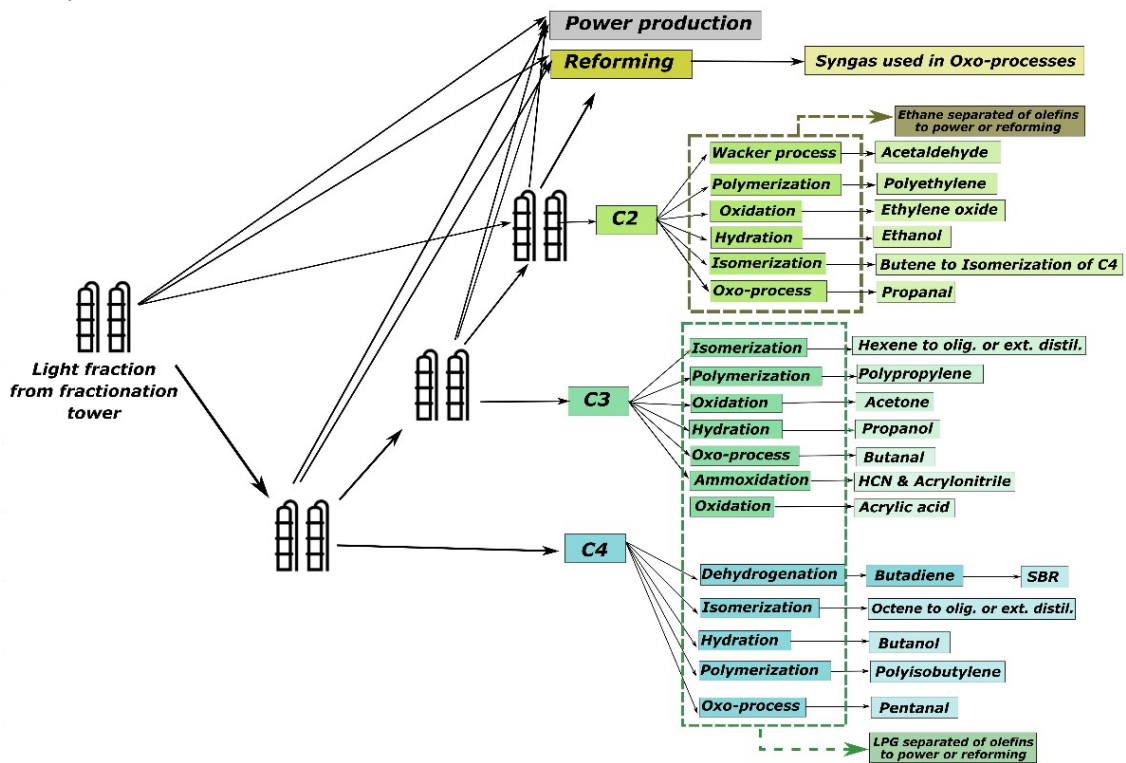

**Figure S-11.** Alternatives for the use of the separation and use of light fractions obtained from pyrolysis.

**S-1.10.1 Integrated olefin oligomerization.**

The first alternative studied is the oligomerization of the olefin mixture<sup>26,27</sup> obtained in pyrolysis to generate highly value-added products. The integrated process with energy recovery presented in our previous work<sup>23</sup> is considered as an alternative. See Figure S-12. A summary of the OPEX and CAPEX is given in Table S-7. The product obtained

from the oligomerization can be sold as lubricant or used for the production of LAB, as given in the following subsection.

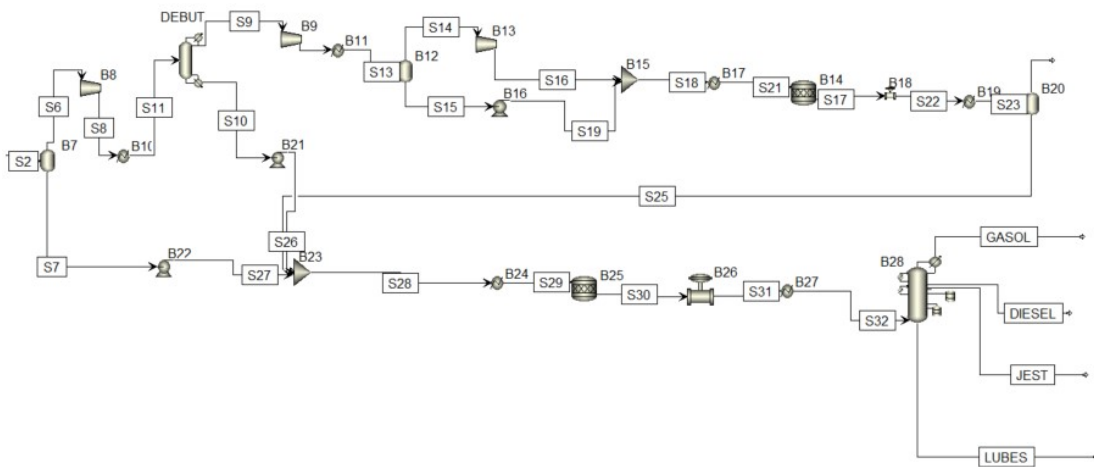

**Figure S-12.** Integrated process for the oligomerization of olefins to a-olefins.

**Table S-7.** Summary of consumptions and CAPEX for integrated oligomerization process.

| Type           | Consumption | CAPEX    |         |
|----------------|-------------|----------|---------|
|                |             | a        | b       |
| Power (kJ/kg)  | 269.0269    | 0.075279 | 0.73325 |
| Ref (kcal/kg)  | 2224.341    |          |         |
| Heat (kcal/kg) | 1186.815    |          |         |

### **S-1.10.2 Production of surfactants.**

The product obtained from the oligomerization can be sold as a lubricant or used for the production of LAB. In the first alternative, the product can be sold as it is. In the second alternative, the LAB production process is based on the Detal process.<sup>28-30</sup> In the process modeling, there is no distinction of the type of alkylbenzene generated (HAB or LAB) leading to one distillation tower less than other processes presented. The ratio benzene: nonene (used as a representative compound from the olefins) is assumed to be 10.<sup>30</sup> The process is presented in Figure S-13. The summary of costs is given in table S-8.

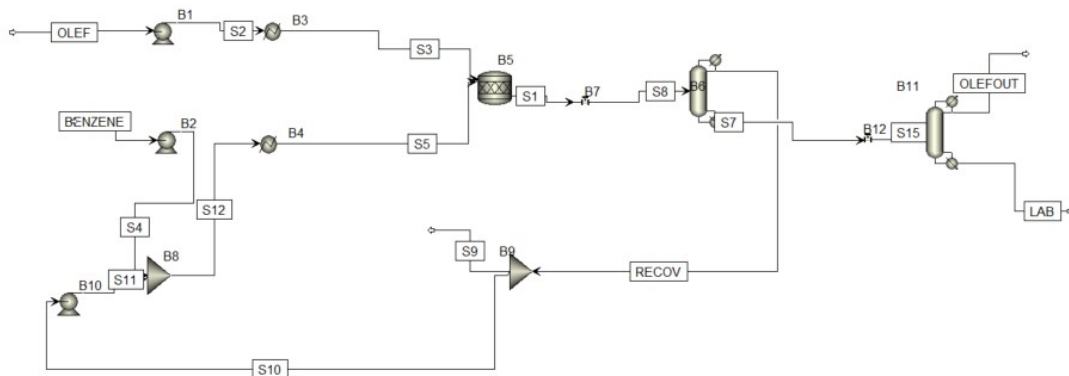

**Figure S-13.** Production of LAB from olefins and benzene.

**Table S-8.** Summary of consumptions and CAPEX for LAB process.

| Type           | Consumption | CAPEX  |        |
|----------------|-------------|--------|--------|
|                |             | a      | b      |
| Power (kJ/kg)  | 3.38        | 0.0096 | 0.2806 |
| Ref (kcal/kg)  | 159.042     |        |        |
| Heat (kcal/kg) | 136.319     |        |        |
| Benzene        | 0.9         |        |        |

### S-1.10.3 Detailed separation.

An alternative to oligomerization is the detailed separation of the products generated. This detailed distillation divides the products in each of the carbon numbers. Then, each fraction is used to provide the most profitable components. The separation is performed by means of a tray of distillation columns as shown in Figure S-14. First, a fractionator is placed for separating a heavy fraction ( $C_n > 8$ ) that is sent to oligomerization, an intermediate liquid fraction, and a gas fraction. The liquid fraction is separated into each of the fractions by individual columns, and the gas fraction is considered to have several alternatives, as defined previously in Figure S-11. Each of the gas fractions can be separated into each of the carbons or they can also be sent to a turbine to generate power or to a reformer for generating  $H_2$ . A summary of the operating costs and CAPEX is given in Table S-9 for each of the columns involved in the separation.

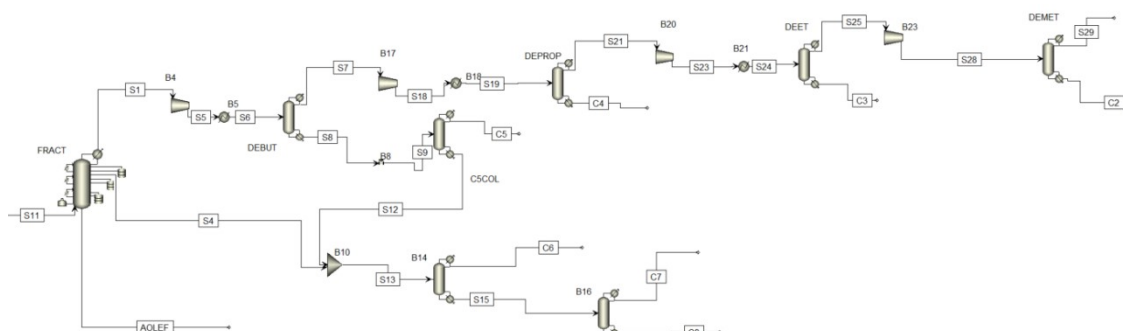

**Figure S-14.** Detailed separation. In the process, gas fractions are also assumed to be separated independently, but they can be separated one by one.

**Table S-9.** Summary of consumptions and CAPEX of fractionation columns. Refrigeration and heat are in kcal/kg<sub>Feed</sub> and Power is in kJ/kg<sub>Feed</sub>.

| Term     | Value    | kJ and kcal/kg feed | CAPEX (a) | CAPEX (b) |
|----------|----------|---------------------|-----------|-----------|
| DESTIL 1 |          |                     | 0.0096    | 0.7849    |
| REF      | -1414971 | -1255.2724          |           |           |
| HEAT     | 1472200  | 1306.04239          |           |           |
| Fin      | 4058     | 1                   |           |           |
| DEBUT    |          |                     | 0.0103    | 0.3978    |
| POWER    | 9.50E+04 | 35.13               |           |           |
| COOLING  | 328373   | 437.182988          |           |           |
| Fin      | 2704     | 1.00E+00            |           |           |
| DEPROP   |          |                     | 0.0097    | 0.1289    |

|                     |          |            |        |        |
|---------------------|----------|------------|--------|--------|
| POWER               | 4.60E+04 | 29.32      |        |        |
| cooling             | 247382   | 659.843002 |        |        |
| Fin                 | 1569     | 1.00E+00   |        |        |
| DE-ETHANIZER        |          |            | 0.0089 | 0.1135 |
| POWER               | 1.80E+04 | 17.95      |        |        |
| COOLING             | 193950   | 809.252991 |        |        |
| Fin                 | 1003     | 1.00E+00   |        |        |
| DE METHANAIZER      |          |            | 0.0073 | 0.0942 |
| POWER               | 4.00E+03 | 5.78       |        |        |
| COOLING             | 5074     | 30.6859682 |        |        |
| Fin                 | 692      | 1.00E+00   |        |        |
| tower c5 from debut |          |            | 0.0037 | 0.3798 |
| HEATING             | 64981    | 206.107137 |        |        |
| COOLIGN             | 101740   | 322.699559 |        |        |
| Fin                 | 1135     | 1.00E+00   |        |        |
| tower c6 from debut |          |            | 0.0035 | 0.1977 |
| HEATING             | 115907   | 302.14714  |        |        |
| COOLIGN             | 109948   | 286.613179 |        |        |
| Fin                 | 1381     | 1.00E+00   |        |        |
| tower c7 - c8       |          |            | 0.0035 | 0.1376 |
| HEATING             | 67915    | 334.008197 |        |        |
| COOLIGN             | 65209    | 320.7      |        |        |
| Fin                 | 732      | 1.00E+00   |        |        |

#### **S-1.10.4 Use of C2 fraction**

C2 fraction is composed of ethylene and traces of ethane. Ethylene is one of the most versatile chemicals used as a starting point in manufacturing more complex compounds (polyethylene, ethylene oxide used to produce ethylene glycol, chlorine compounds, ethanol, etc.). A summary of applications is given in Figure S-15.<sup>31</sup> However, not all the compounds presented in Figure S-16 have the same value and their production may involve other valuable materials. For example, vinyl-chloride requires using  $Cl_2$ <sup>32</sup> which is more valuable than ethylene and styrene requires benzene. Thus, the price and emissions of these chemicals are governed by those more valuable raw materials, and they are discarded in the formulation of the superstructure optimization.

Similarly, the polymers produced from those chemicals: polyvinyl chloride (PVC) and PET have only slightly higher prices than Polyethylene (PE). Thus, PE production is selected as a representative for simplification since it is a direct process and does not require other pricy compounds (e.g.  $Cl_2$  in PVC production). Other alternatives to finished products are: the production of acetaldehyde, which can be later used in the production of perfumes, drugs, etc.;<sup>33</sup> ethylene oxide, a platform for other chemicals; propionaldehyde, another high valuable compound used in synthetic flavoring, disinfectant or preservatives;<sup>34</sup> ethanol by hydration and butene by oligomerization. In the following lines, the processes modeled for each alternative are presented.

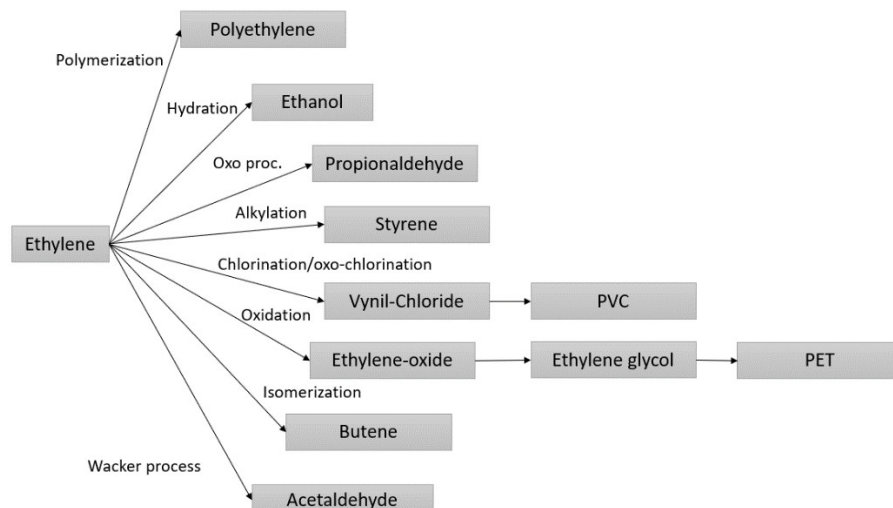

**Figure S-15.** Alternatives for the use of ethylene.

**The Wacker process for the production of acetaldehyde** from ethylene is modeled as presented in Figure S-16. The process first purifies the C2 stream to increase the concentration of ethylene. Then, it requires a catalytic oxidation reactor operating at 130°C and 4 bar with PdCl<sub>2</sub> as a catalyst.<sup>35</sup> The acetaldehyde produced is finally recovered from the ethylene mixture with an extractive distillation. Water is employed to recover acetaldehyde and then a fractionation column is placed. A summary of the consumptions of the process and the surrogate model for the Capex is presented in Table S-10.

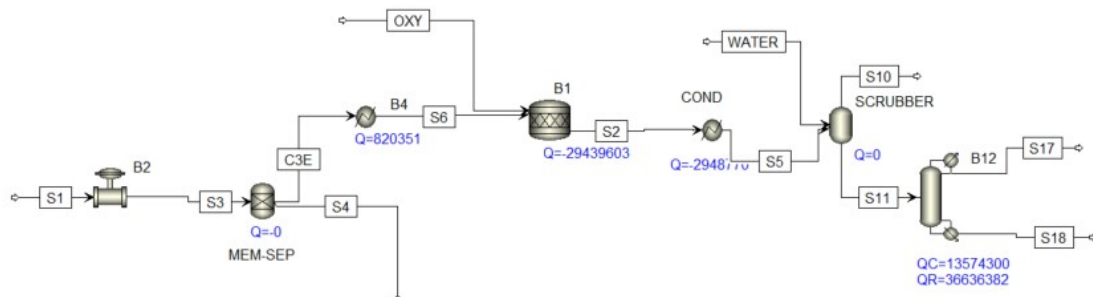

**Figure S-16.** Production of acetaldehyde from ethylene via Wacker Process, A) as defined in literature and B) represented in the model.

**Table S-10.** Summary of consumptions and CAPEX for Wacker process.

| Type           | Consumption (Kg or kcal/kgLDPE) | CAPEX  |        |
|----------------|---------------------------------|--------|--------|
|                |                                 | a      | b      |
| Ref            | 920.41                          | 0.0086 | 0.7629 |
| Heat           | 204.00                          |        |        |
| Oxygen         | 0.278                           |        |        |
| Purified Water | 0.083                           |        |        |

**One alternative is the production of propanal by hydroformylation.** The oxo-process is modeled as presented in Figure S-17. In the process, hydroformylation occurs in a reactor operating at 16.5 bar and 175 °C with Co<sub>2</sub>(CO)<sub>8</sub> as catalysts.<sup>36</sup> A syngas to

ethylene ratio of 1:1 is required. The yield achieved in the reactor is assumed to be 80%, based on the report for that type of catalyst for all the aldehydes.<sup>37</sup>To increase the yield, the unreacted products are recycled in a flash separator. The models for the consumptions and CAPEX are reduced with the parameters presented in Table S-11.

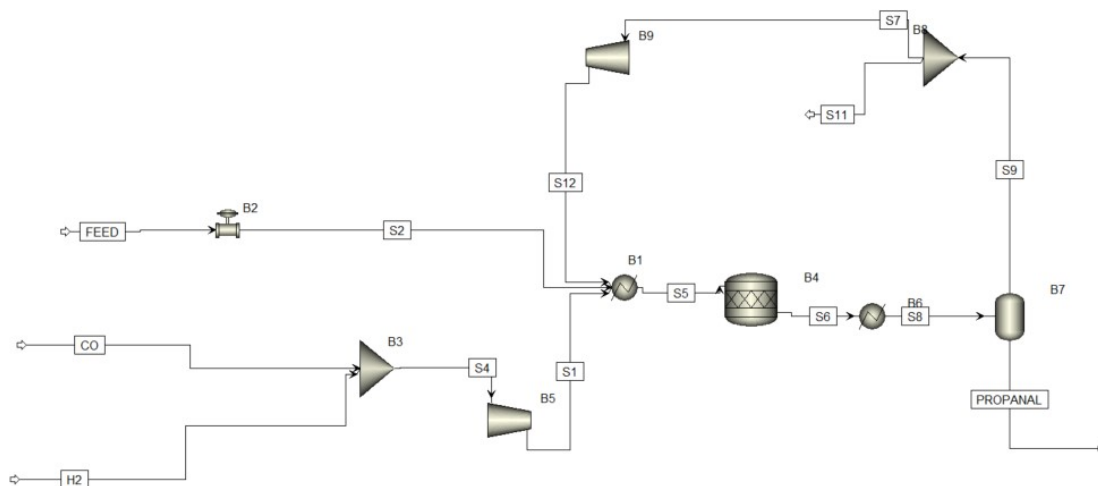

**Figure S-17.** Oxo process for the production of propanal from ethylene.

**Table S-11.** Summary of consumptions and CAPEX for Propanal production process.

| Type           | Consumption | CAPEX  |       |
|----------------|-------------|--------|-------|
|                |             | a      | b     |
| Ref (kcal/kg)  | 730.630833  | 0.0333 | 0.787 |
| Heat (kcal/kg) | 414.430278  |        |       |
| Power (kJ/kg)  | 2301        |        |       |
| CO (kg/kg)     | 0.694       |        |       |
| H2 (kg/kg)     | 0.083       |        |       |

**Polyethylene production** is modeled following the Union Carbide process described in the patent US 4,543,399.<sup>38,39</sup> A fluidized bed reactor operating at  $T=54^{\circ}\text{C}$  and  $P=270\text{psi}$  is used in the process. The process flowsheet is presented in Figure S-18, and all the consumptions and costs are estimated using Aspen Plus. The PE obtained in the process is finally sent to an extruder, which is modeled as the one used for the mechanical recycling and also using Peter's Timmerhaus cost estimator for the CAPEX. A summary of the consumptions and surrogate model for the CAPEX is given in Table S-12.

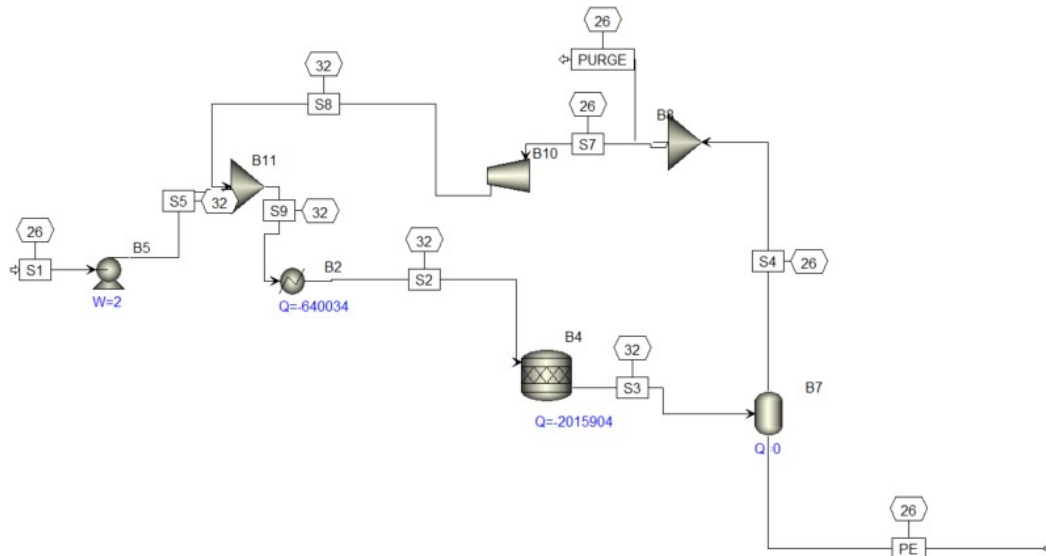

Figure S-18. Production of LDPE from ethylene.

Table S-12. Summary of consumptions and CAPEX for Polyethylene production process.

| Type           | Consumption | CAPEX  |       |
|----------------|-------------|--------|-------|
|                |             | a      | b     |
| Ref (kcal/kg)  | 4327.49     | 0.0387 | 0.626 |
| Heat (kcal/kg) | 0           |        |       |
| Power (kJ/kg)  | 2707.2      |        |       |

**Ethylene to ethanol by hydration.** Although it has been demonstrated not to be the most profitable route for ethanol production,<sup>40</sup> the process only requires water as raw material. In fact, the route followed is typically the opposite, using ethanol to produce ethylene since it is more profitable. Instead of these cons, the process has been modeled as addressed in Figure S-19. The hydration reactor requires steam with a steam: ethylene ratio of 2.4:1 at 60 bar and 246 °C.<sup>40</sup> The conversion to ethanol is limited to 5% per pass. So ethylene needs to be recycled.<sup>41</sup> A summary of the consumptions and parameters for CAPEX estimation are given in Table S-13.

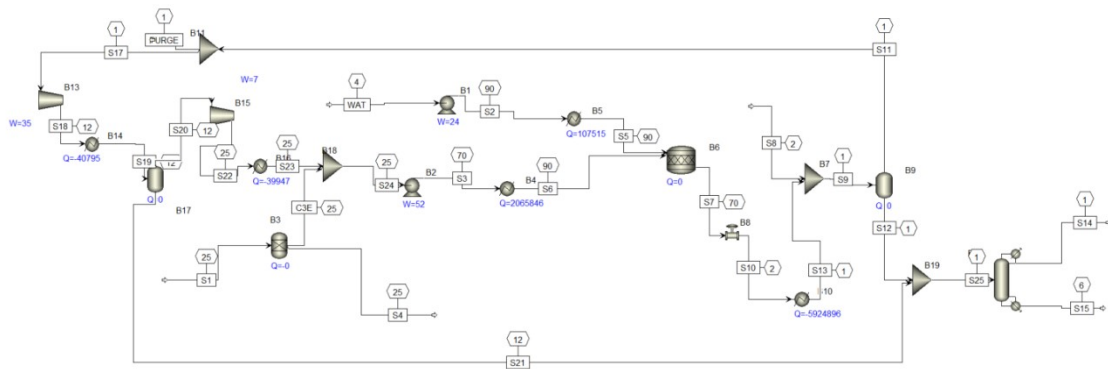

Figure S-19. Production of ethanol from ethylene.

**Table S-13.** Summary of consumptions and CAPEX for the ethanol production process.

| Type                   | Consumption | CAPEX  |      |
|------------------------|-------------|--------|------|
|                        |             | a      | b    |
| Ref (kcal/kg)          | 563.75      | 0.0507 | 0.41 |
| Heat (kcal/kg)         | 270.61      |        |      |
| Power (kJ/kg)          | 7011        |        |      |
| Purified wáter (kg/kg) | 0.801       |        |      |

**Ethylene oxide** is one of the most widely used compounds obtained from ethylene. The production of ethylene oxide is carried out between 200 °C and 300 °C and pressures between 10 and 20 bar, with yields around 85%. The process flowsheet is modeled following the previous works<sup>39</sup> and presented in Figure S-20. The summary of the models for the consumptions and CAPEX is presented in Table S-14.

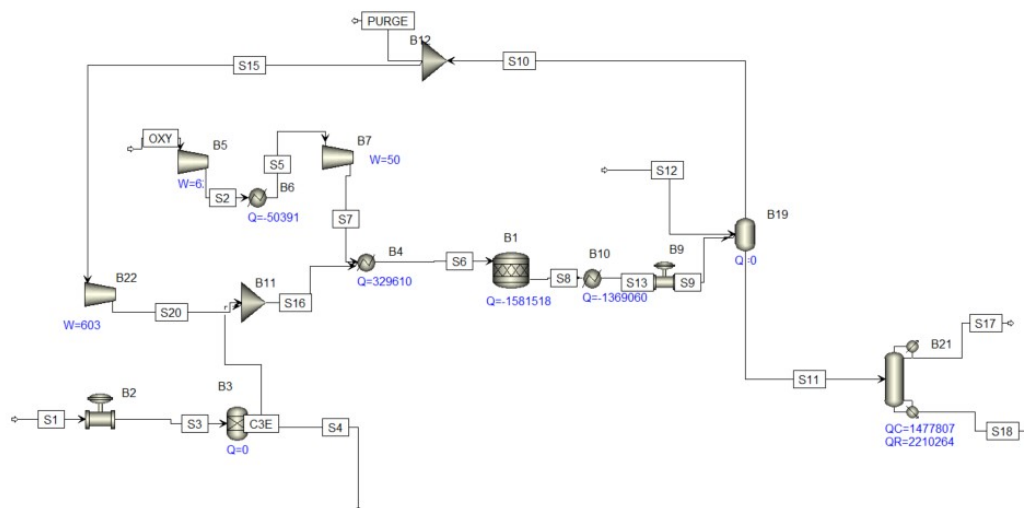

**Figure S-20.** Process flowsheet to produce ethylene oxide from ethylene.

**Table S-14.** Summary of consumptions and CAPEX for ethylene oxide production process.

| Type                   | Consumption | CAPEX  |        |
|------------------------|-------------|--------|--------|
|                        |             | a      | b      |
| Ref (kcal/kg)          | 1048.83     | 0.0351 | 0.3707 |
| Heat (kcal/kg)         | 4.6984      |        |        |
| Power (kJ/kg)          | 56.7        |        |        |
| Purified wáter (kg/kg) | 0.025       |        |        |
| Oxygen                 | 0.25        |        |        |

**Isomerization to butene** is modeled following the patent<sup>26</sup> as done for the light olefins fraction in the integrated oligomerization process presented before. In this process, the reactor converts 90% of the ethylene at 70 bar and 200 °C with ZSM-5 zeolites as a



catalyst.<sup>26</sup> Once oligomerization occurs in the fixed bed reactor, the higher olefins obtained as a product are separated in a flash vessel from the paraffins. A summary of the consumptions and parameters for the estimation of the CAPEX with a surrogate is given in Table S-15.

**Table S-15.** Summary of consumptions and CAPEX for isomerization of ethylene.

| Type           | Consumption | CAPEX  |        |
|----------------|-------------|--------|--------|
|                |             | a      | b      |
| Ref (kcal/kg)  | 292.78      | 0.0146 | 0.3881 |
| Heat (kcal/kg) | 5.37        |        |        |
| Power (kJ/kg)  | 123.50      |        |        |

### S-1.10.5 Use of C3 fraction

Olefin C3 fraction can also be used to produce a wide variety of chemicals summarized in Figure S-21.<sup>42</sup> In a similar way that for ethylene, some components can be removed from scratch since olefin production is not the main contributor to the costs. The other additional raw materials needed require other processes with no simple routes from plastic waste. For example, the main cost of cumene is given by the benzene used as raw material, which is produced by the catalytic hydration of a hydrocarbon mixture, and the current plastic waste route requires a similar process.

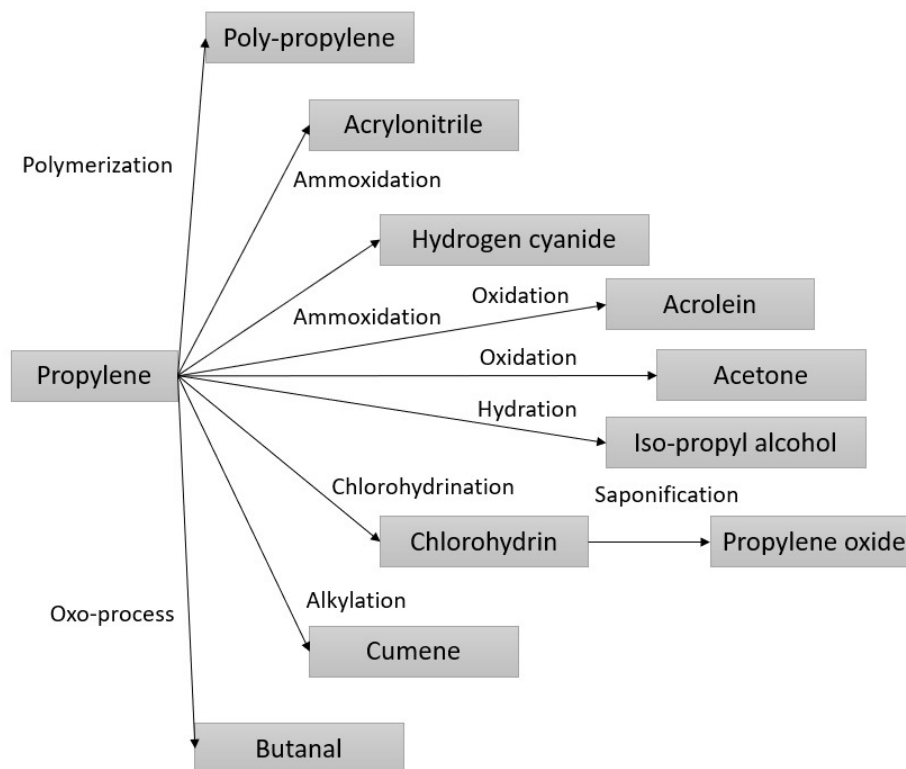

**Figure S-21.** Summary of propylene uses.

**Polypropylene production** Polypropylene is generated following the same Union Carbide process described previously for LDPE production and the patent 4,543,399.<sup>38</sup> The operating temperature of the fluidized bed is reduced to 60°C at a pressure of 270 psig. The results obtained for the fluxes and CAPEX are summarized in Table S-16.

**Table S-16.** Summary of fluxes and CAPEX for the polypropylene-Union Carbide production process.

| Type           | Consumption | CAPEX  |        |
|----------------|-------------|--------|--------|
|                |             | a      | b      |
| Ref (kcal/kg)  | 466.3553    | 0.0143 | 0.3561 |
| Heat (kcal/kg) | 0           |        |        |
| Power (kJ/kg)  | 1076.349    |        |        |

**Butanal production by hydroformylation.** We follow the low-pressure, 1.8 MPa, oxo process developed by Union Carbide.<sup>43</sup> This process employs Rhodium as a catalyst in high boiling thick oil at 97 °C.<sup>44</sup> The reaction mixture is separate from volatile components in a falling film evaporator. The process is presented in Figure S-22. A summary of the consumptions and correlation generated for estimating the CAPEX is given in Table S-17.

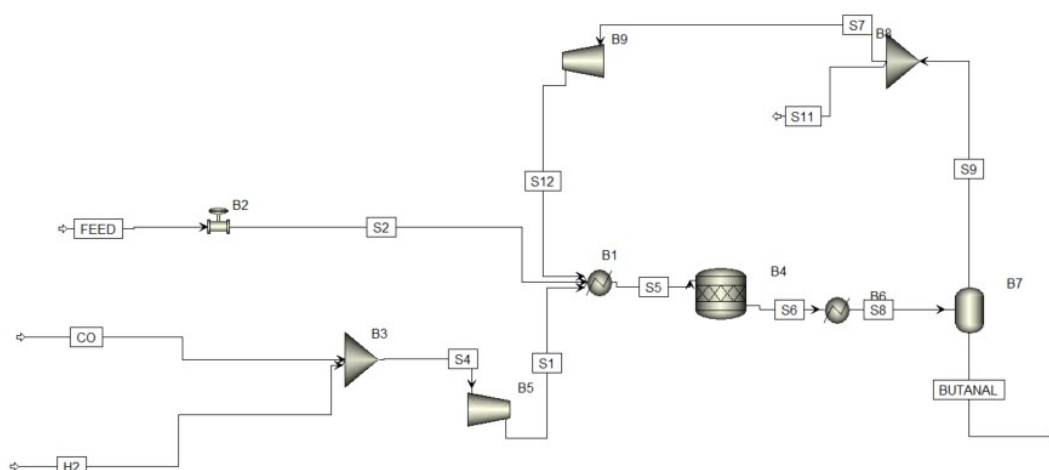

**Figure S-22.** Butanal production from propylene.

**Table S-17.** Summary of fluxes and CAPEX for the butanal production process.

| Type           | Consumption | CAPEX  |        |
|----------------|-------------|--------|--------|
|                |             | a      | b      |
| Ref (kcal/kg)  | 140.763     | 0.0308 | 0.5197 |
| Heat (kcal/kg) | 22.2096     |        |        |
| Power (kJ/kg)  | 0.29945     |        |        |
| H2 (kg/kg)     | 0.6404057   |        |        |
| CO (kg/kg)     | 0.6730794   |        |        |

### **Oxidation of propylene to acetone**

The process for producing acetone from propylene is carried out following the Wacker process as previously designed for acetaldehyde production.<sup>45</sup> The oxidation occurs at 110 °C and 10 atm, achieving high conversion rates, ~94%.<sup>46</sup> The process is presented in Figure S-23 and a summary of the consumptions and function for estimating the Capex is given in Table S-18.

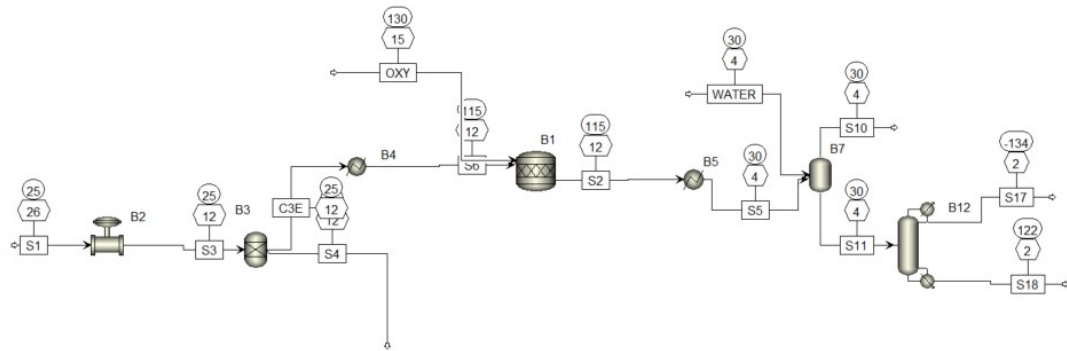

**Figure S-23.** Oxidation of propylene to acetone.

**Table S-18.** Summary of fluxes and CAPEX for the production of acetone from propylene.

| Type                   | Consumption | CAPEX  |        |
|------------------------|-------------|--------|--------|
|                        |             | a      | b      |
| Ref (kcal/kg)          | 1378.611    | 0.0099 | 0.7161 |
| Heat (kcal/kg)         | 202.3686    |        |        |
| Power (kJ/kg)          | -           |        |        |
| Water (kg/kg)          | 0.0556      |        |        |
| O <sub>2</sub> (kg/kg) | 0.2500      |        |        |

**Hydration for the production of propanol.** Production of iso-propanol by hydration of propylene is carried out following direct hydration like in the Texaco process.<sup>47,48</sup> In the process, hydration takes place in a strong acid ion exchange membrane at high pressure, 80-100 atm, and low temperature, 150 °C.<sup>49</sup> The process is presented in Figure S-24, and the summary of consumptions and CAPEX is given in Table S-19.

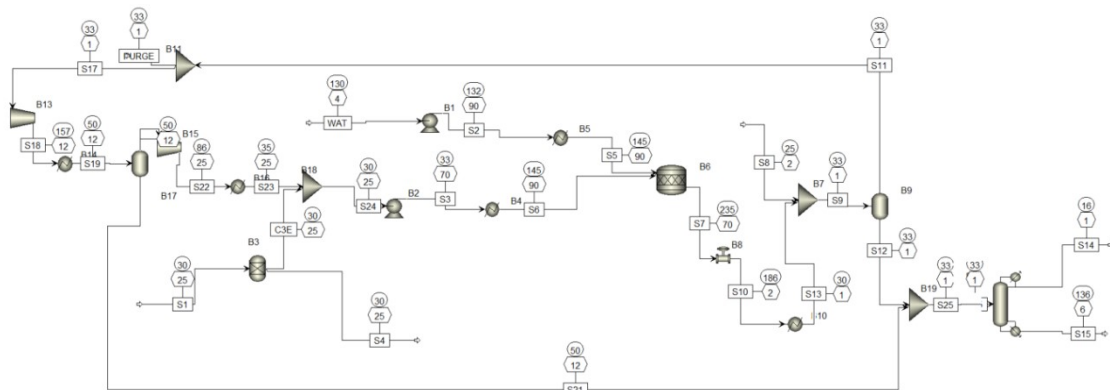

**Figure S-24.** Production of propanol via direct hydration.

**Table S-19.** Summary of fluxes and CAPEX for the production of propanol from propylene.

| Type           | Consumption | CAPEX  |        |
|----------------|-------------|--------|--------|
|                |             | a      | b      |
| Ref (kcal/kg)  | 229.778     | 0.0393 | 0.6846 |
| Heat (kcal/kg) | 324.722     |        |        |
| Power (kJ/kg)  | 14.9        |        |        |
| Water (kg/kg)  | 0.2         |        |        |

### Ammonoxidation to HCN and acrylonitrile

One alternative use is the production of acrylonitrile, a valuable monomer employed as pesticide and in the production of plastics, rubbers. The production of acrylonitrile simultaneously generates HCN through the Sohi process. The process is presented in Figure S-25, and it requires a Propylene:NH<sub>3</sub>:Air ratio of 1:1.1:8.1, achieving a conversion of ~80%.<sup>50,51</sup> Once Propylene reacts, the product is sent to a set Quench neutralizer where the unconverted ammonia reacts with a sulfuric acid diluted solution to be transformed into an ammonium sulfate. After removing the ammonia, the light gases (unreacted air) are separated in a stripping column. Then, the organic gases are sent to a set of fractionation columns; where HCN is recovered first, and acrylonitrile is separated.<sup>52</sup> A summary of the consumptions in the process and correlation for CAPEX estimation are given in Table S-20.

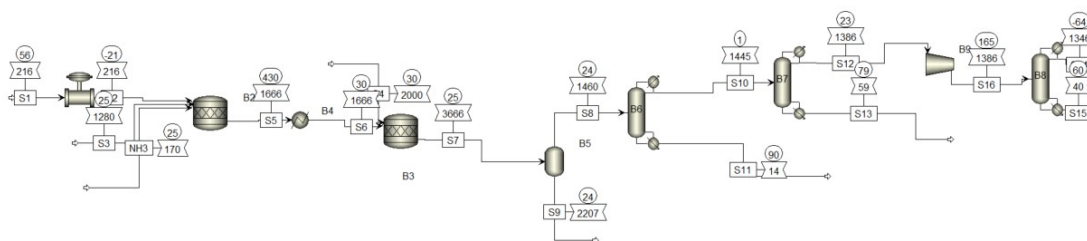

**Figure S-25.** Production of acrylonitrile from propylene.

**Table S-20.** Summary of consumptions and parameters for the CAPEX correlation for acrylonitrile production from propylene.

| Type                    | Consumption | CAPEX  |        |
|-------------------------|-------------|--------|--------|
|                         |             | a      | b      |
| Ref (kcal/kg)           | 52.14       | 0.0769 | 0.2664 |
| Heat (kcal/kg)          | 1191.34     |        |        |
| Power (kJ/kg)           | 0.342       |        |        |
| Water (kg/kg)           | 6.190       |        |        |
| NH <sub>3</sub> (kg/kg) | 0.882       |        |        |

### Acrylic acid production via oxidation of propylene

The production of acrylic acid is performed by means of partial oxidation with oxygen and steam following the Lurgi process.<sup>53</sup> A description of the process is given in Figure S-26. Acrylic acid is produced through a chain reaction: In the first reaction, propylene is oxidized to acrolein, and in the second reaction, acrolein forms acrylic acid.<sup>52</sup> A side reaction also results in acetic acid (~7%). The products obtained at the outlet are sent to an extractive distillation system. First, an extraction tower where they are extracted with methyl-isobutyl ketone, and then a distillation tower to separate the acids.<sup>53</sup> The off-gas

obtained in extraction is mainly composed of the unreacted propylene recycled back to the reactor.

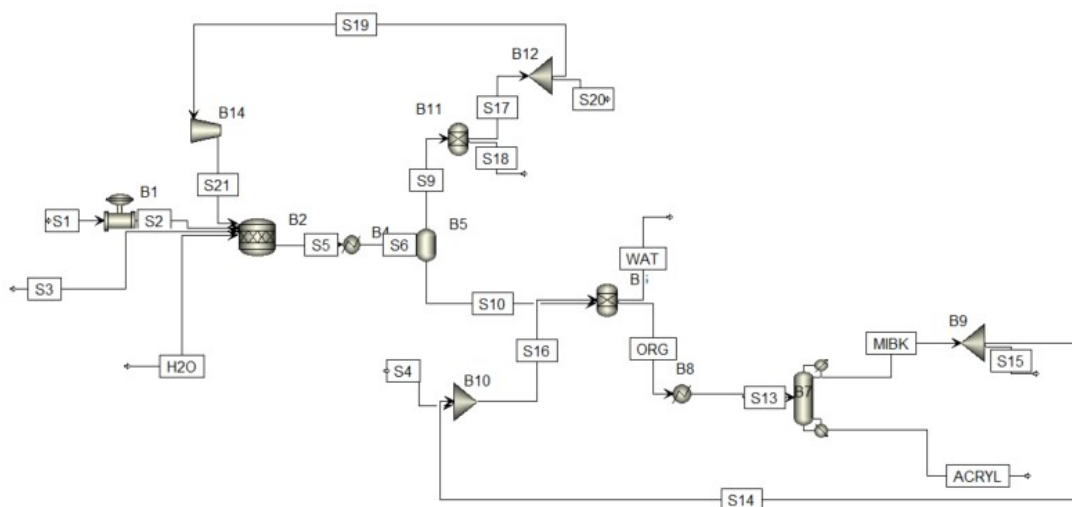

**Figure S-26.** Production of acrylic acid from propylene.

**Table S-21.** Summary of consumptions and parameters for the CAPEX correlation for acrylic acid production from propylene.

| Type           | Consumption | CAPEX  |       |
|----------------|-------------|--------|-------|
|                |             | a      | b     |
| Ref (kcal/kg)  | 2592.0522   | 0.0874 | 0.537 |
| Heat (kcal/kg) | 425.5383    |        |       |
| Power (kJ/kg)  | 0.037354    |        |       |
| Water (kg/kg)  | 2.3346      |        |       |

#### **S-1.10.6 Use of C4 fraction**

The C4 fraction of olefins has multiple alternatives that are summarized in Figure S-27. The two main isomers obtained by thermodynamic equilibrium in pyrolysis are iso-butene ( $\approx 70\%$ ) and 1-butene ( $\approx 25\%$ ). Isobutene can be used to produce multiple products such as polymers, fuels (MTBE, ETBE), solvents, or oxidants. All the possible products presented in Figure S-27 are studied except MTBE since the interesting route is the opposite (iso-butene has nearly the double value of MTBE) so it will never be a realistic or interesting alternative, even from an environmental point of view. The remaining options for i-butene are studied such as the production of polyisobutylene, the isomerization to alpha olefins assumed to be iso-octane, the hydration to tert-butanol, and the hydroformylation to pentanal. Furthermore, one alternative for n-butene is also considered: butadiene production by dehydrogenation and its later use as styrene-butadiene-rubber (SBR). Other polymers such as neoprene and acrylonitrile-butadiene-styrene (ABS) can also be produced from butadiene, but the analysis is simplified, including only SBR production since in the remaining products, the changes would be given by the additional components (Styrene, acrylic acid) instead of butadiene production.

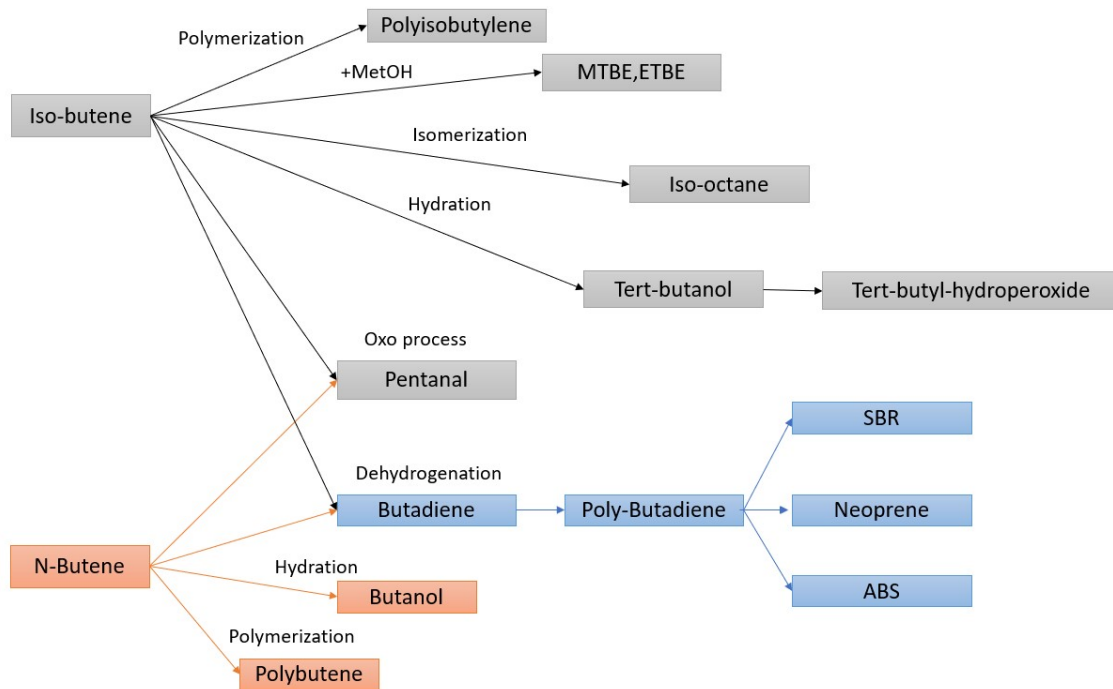

**Figure S-27.** Uses of butene compounds.

**Polyisobutylene and polybutylene** are modeled following the Exxon process based on the polymerization at a low temperature,  $-40^{\circ}\text{C}$ , in a hexane solution.<sup>54</sup> The process is modeled as presented in Figure S-28. A summary of the fluxes and the function parameters for estimating the CAPEX is given in Table S-22.

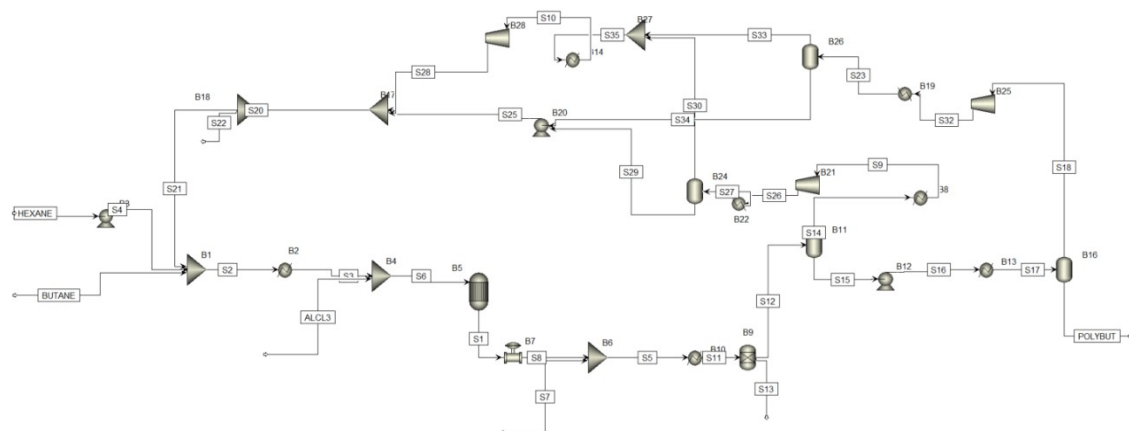

**Figure S-28.** Production of polybutylene from butene.

**Table S-22.** Summary of consumptions and function for CAPEX estimation for the production of polybutylene from butene.

| Type                 | Consumption | CAPEX  |        |
|----------------------|-------------|--------|--------|
|                      |             | a      | b      |
| Ref (kcal/kg)        | 138.7542    | 0.0485 | 0.3252 |
| Heat (kcal/kg)       | 61.15373    |        |        |
| Power (kJ/kg)        | 810.801     |        |        |
| Power refrig (kJ/kg) | 264.8403    |        |        |
| Water (kg/kg)        | 1.442687    |        |        |

|                           |          |  |  |
|---------------------------|----------|--|--|
| Hexane (kg/kg)            | 0.416346 |  |  |
| AlCl <sub>3</sub> (kg/kg) | 0.009682 |  |  |

**Oligomerization of butene** to larger chains takes place on acid catalysts like zeolites at temperatures around 100 °C, and pressures ~1.7 MPa.<sup>55</sup> The process is similar to the previously described but operates at lower pressures. It achieves a high conversion, ~90%, being the alpha olefins separated from paraffins in a flash separator. The process is presented in Figure S-29, and a summary of the consumptions and capex is given in Table S-23.

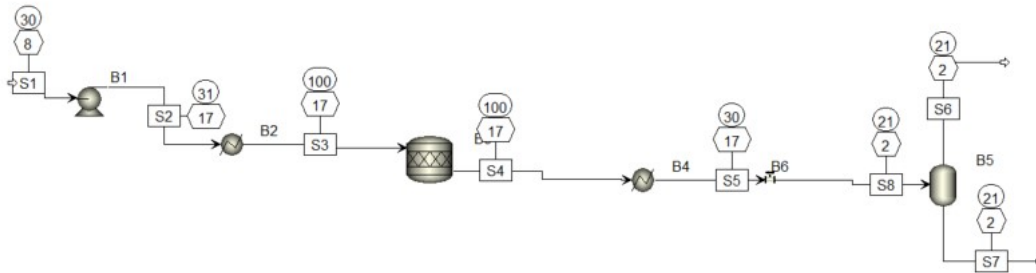

**Figure S-29.** Isomerization of butene to alpha olefins.

**Table S-23.** Summary of consumptions and function for CAPEX estimation for the isomerization of butene.

| Type           | Consumption | CAPEX  |        |
|----------------|-------------|--------|--------|
|                |             | a      | b      |
| Ref (kcal/kg)  | 110.65      | 0.0047 | 0.2644 |
| Heat (kcal/kg) | 6.48        |        |        |
| Power (kJ/kg)  | 1.60        |        |        |

**Hydration of butene to butanol.** Hydration of butene for butanol production is modeled following the Saudi Aramco process that requires the hydration of a mixture of butenes at high pressures, 68 bar, and 150°C, with conversions ~14% using ZSM-5 activated zeolites as catalysts. The process is the same as the one followed for propanol production. Only the conversion is low, only 14% is converted to butanol per pass.<sup>56</sup> Furthermore, the conversion is not selective to a single C4 alcohol, and it produces a mixture of alcohols that can be used as additives for fuels. The process is depicted in Figure S-30. A summary of the consumptions and CAPEX function is given in Table S-24.

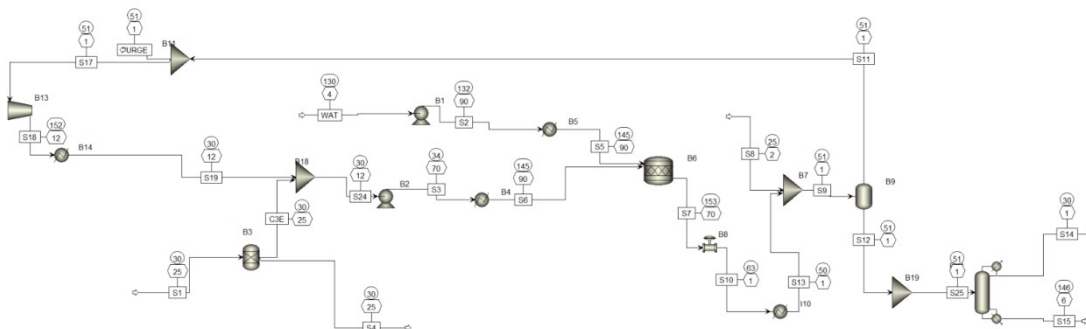

**Figure S-30.** Hydration of butene to butanol.

**Table S-24.** Summary of consumptions and function for CAPEX estimation for the hydration of butene to butanol.

| Type           | Consumption | CAPEX  |        |
|----------------|-------------|--------|--------|
|                |             | a      | b      |
| Ref (kcal/kg)  | 1483.64     | 0.0295 | 0.2438 |
| Heat (kcal/kg) | 1085.33     |        |        |
| Power (kJ/kg)  | 736.62      |        |        |
| Water (kg/kg)  | 0.808       |        |        |

**Dehydrogenation of butylene to butadiene** is one interesting route since this monomer is employed in producing polymers like styrene-butadiene rubber (SBR). The dehydrogenation process is modeled following the Houndry Catadiene process.<sup>56</sup>The C4 stream is sent to a catalytic reactor operating at 650°C and 2 atm under chromium oxide as a catalyst, obtaining a conversion ~20% per pass. Butadiene is later separated (concentration achieved of 50%) with extractive distillation using acetone as extractant.<sup>57</sup>. The process is summarized in Figure S-31.

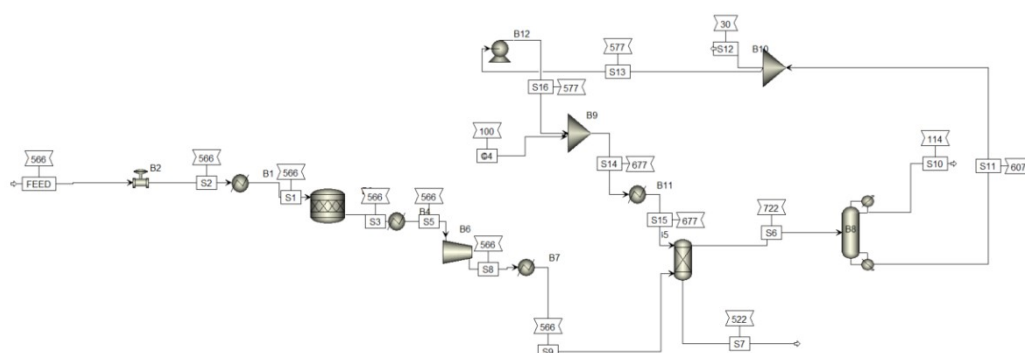

**Figure S-31.** Dehydrogenation process for the production of butadiene from butene and butane.

Once butadiene is selectively separated, it is polymerized with styrene in stirred tank reactors at 0.5 MPa and 25°C.<sup>58,59</sup> After polymerization, SBR is separated by a vacuum separator to recover the gases, followed by a neutralization column that recovers the water employed in the polymerization, see the process in Figure S-32. The summary of the consumptions of both processes and the CAPEX are given in Table S-25.



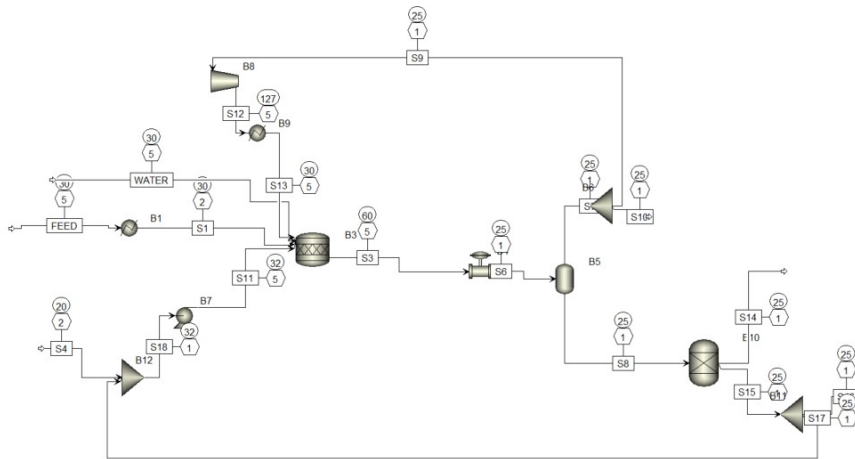

**Figure S-32.** Production of SBR from butadiene and styrene.

**Table S-25.** Summary of consumptions and function for CAPEX estimation for the production of SBR.

| Type            | Consumption | CAPEX  |        |
|-----------------|-------------|--------|--------|
|                 |             | a      | b      |
| Ref (kcal/kg)   | 329.72      | 0.0657 | 0.5157 |
| Heat (kcal/kg)  | 0           |        |        |
| Power (kJ/kg)   | 2571        |        |        |
| Water (kg/kg)   | 0.167       |        |        |
| Styrene (kg/kg) | 0.35        |        |        |

**Oxo-process for pentanal production.** The last alternative for the C4 fraction considers the production of pentanal by hydroformylation of butene following the ExxonMobil patent.<sup>60</sup> The oxo-process is similar to those presented previously, where syngas reacts with butenes in a hydroformylation reactor. However, the operating conditions of the hydroformylation reactor require operating at 15 bar, and ~95 °C, with an H<sub>2</sub> to CO molar ratio of 5:1. The conversion per pass is around 60% so that the unreacted components are recycled, as given in Figure S-33. The summary of the consumptions and CAPEX model are shown in Table S-26.

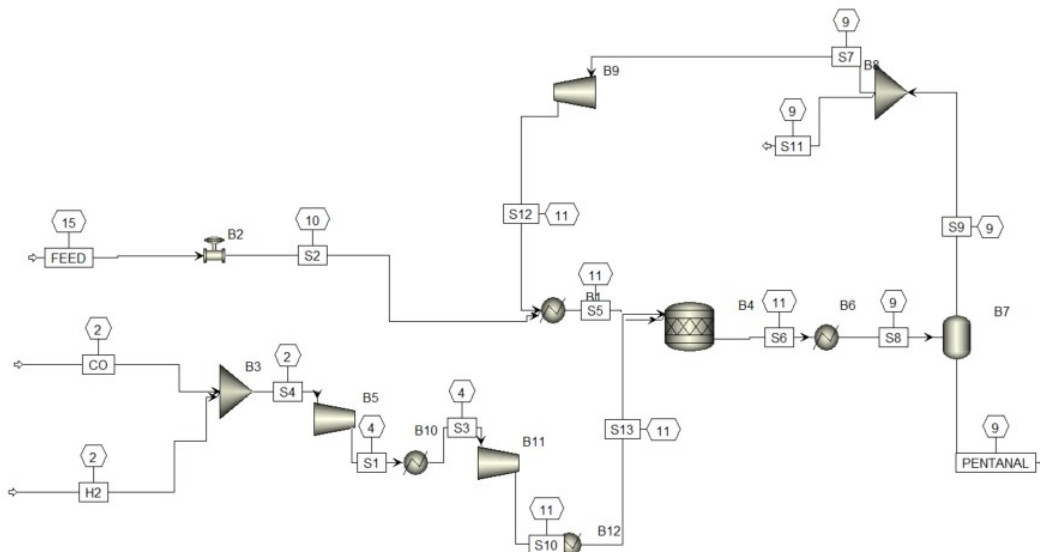

**Figure S-33.** Production of pentanal from butylene.

**Table S-26.** Summary of consumptions and function for CAPEX estimation for the production of pentanal.

| Type                   | Consumption | CAPEX  |        |
|------------------------|-------------|--------|--------|
|                        |             | a      | b      |
| Ref (kcal/kg)          | 768.71      | 0.0273 | 0.3169 |
| Heat (kcal/kg)         | 0.0         |        |        |
| Power (kJ/kg)          | 101.6809    |        |        |
| CO (kg/kg)             | 0.17384     |        |        |
| H <sub>2</sub> (kg/kg) | 0.012809    |        |        |

#### **S-1.10.7 Use of C5 fraction**

Olefins produced in the C5 fraction can be separated independently to produce pentane and pentene, which can be used as solvents or plasticizers without any other modification, or they can be transformed into hexanal, an aldehyde with smell to grass widely used in the perfume industry.

**Hexanal production** The production of hexanal is carried out through the oxo process operating at 45 bar and 110 °C, with yields of ~90%.<sup>61,62</sup> The process is similar to the one presented for the production of other aldehydes. Only the operating conditions are different. A summary of the consumptions of syngas, utilities, and the function employed for estimating the CAPEX is given in Table S-27.

**Table S-27.** Summary of consumptions and function for CAPEX estimation for the production of hexanal.

| Type | Consumption | CAPEX |   |
|------|-------------|-------|---|
|      |             | a     | b |

|                |           |        |        |
|----------------|-----------|--------|--------|
| Ref (kcal/kg)  | 158.84249 | 0.0457 | 0.1086 |
| Heat (kcal/kg) | 0         |        |        |
| Power (kJ/kg)  | 278.9268  |        |        |
| CO (kg/kg)     | 0.083277  |        |        |
| H2 (kg/kg)     | 0.005948  |        |        |

### **Separation of pentene**

As an alternative to hydroformylation, one option for processing pentene is to extract it from the mixture with paraffins and sell it as a solvent. The process for separating pentene from pentane is performed by extractive distillation employing acetone as solvent.<sup>63,64</sup> After extraction, and the separation of pentene from acetone by distillation, acetone is recycled to minimize operating costs. A summary of the consumptions and CAPEX is given in Table S-28.

**Table S-28.** Summary of consumptions and function for CAPEX estimation for the production of pentene.

| Type            | Consumption | CAPEX  |        |
|-----------------|-------------|--------|--------|
|                 |             | a      | b      |
| Ref (kcal/kg)   | 57.0474502  | 0.0316 | 0.5294 |
| Heat (kcal/kg)  | 66.3914218  |        |        |
| Power (kJ/kg)   | 0           |        |        |
| Acetone (kg/kg) | 0.150455    |        |        |

### **S-1.10.8 Use of C6 to C8 fractions**

Similarly to C5 fraction, C6 to C8 fractions are very valuable products since they are used in specialized industries like flavors, perfumes, plasticizers, or pesticides. The two alternatives considered for each of these fractions are the separation of the olefins and paraffins by means of extractive distillation for them to be used independently and the oxo-process for producing aldehydes and alcohol-based components. Since the processing of aldehydes requires less processing (alcohols are obtained by reacting aldehydes with hydrogen),<sup>65</sup> the process is assumed to stop as aldehydes from the oxo process. Apart from aldehydes, the other alternatives considered for these fractions are the separation of the olefins for being sold as solvents and the oligomerization to larger chains to produce lubes and detergents. Extractive distillation is assumed to be carried out similarly and with the same consumptions as for separating pentene from pentane. The production of aldehydes and the oligomerization are summarized in the following paragraphs.

**Aldehydes production by hydroformylation.** Heptanal, octanal, and nonanal production are modeled as presented in previous hydroformylation processes. In this case, the operating conditions for producing heptanal have been taken from the Union Carbide patent.<sup>62</sup> The process is suggested to operate at 90 °C and with a pressure of ~25 bar with a syngas to olefin ratio of 3:1 and a H<sub>2</sub>:CO ratio of 1:1 under Rhodium

catalysts. The conversion achieved per pass is reported to be 88%, so unreacted raw materials are separated from aldehydes and recovered. A summary of the consumptions and correlation for the estimation of the CAPEX are given in Tables S-29, S-30, and S-31.

**Table S-29.** Summary of consumptions and function for CAPEX estimation for the production of heptanal.

| Type           | Consumption | CAPEX  |        |
|----------------|-------------|--------|--------|
|                |             | a      | b      |
| Ref (kcal/kg)  | 160.3415118 | 0.0207 | 0.1187 |
| Heat (kcal/kg) | 0           |        |        |
| Power (kJ/kg)  | 57.44000479 |        |        |
| CO (kg/kg)     | 0.1299827   |        |        |
| H2 (kg/kg)     | 0.0103986   |        |        |

**Table S-30.** Summary of consumptions and function for CAPEX estimation for the production of octanal.

| Type           | Consumption | CAPEX  |       |
|----------------|-------------|--------|-------|
|                |             | a      | b     |
| Ref (kcal/kg)  | 136.861407  | 0.0283 | 0.808 |
| Heat (kcal/kg) | 0           |        |       |
| Power (kJ/kg)  | 58.9067     |        |       |
| CO (kg/kg)     | 0.095987    |        |       |
| H2 (kg/kg)     | 0.007578    |        |       |

**Table S-31.** Summary of consumptions and function for CAPEX estimation for the production of nonanal.

| Type           | Consumption | CAPEX  |        |
|----------------|-------------|--------|--------|
|                |             | a      | b      |
| Ref (kcal/kg)  | 74.88614    | 0.0225 | 0.0701 |
| Heat (kcal/kg) | 0           |        |        |
| Power (kJ/kg)  | 36.547240   |        |        |
| CO (kg/kg)     | 0.0603436   |        |        |
| H2 (kg/kg)     | 0.0054858   |        |        |

### **Oligomerization to higher carbon fractions**

Fractions of olefins above C8 are assumed to be oligomerized for producing olefins with chains with more than 8 carbons that can be straightforwardly sold as lube oil or used in producing LAB, a surfactant. The process only includes the oligomerization section of alpha olefins presented in Figure S-12. A summary of the consumptions and CAPEX is provided in Table S-32.

**Table S-32.** Summary of consumptions and function for CAPEX estimation for the oligomerization of alpha olefins.

| Type          | Consumption | CAPEX |   |
|---------------|-------------|-------|---|
|               |             | a     | b |
| Ref (kcal/kg) | 361.78273   |       |   |

|                |           |        |        |
|----------------|-----------|--------|--------|
| Heat (kcal/kg) | 467.57791 | 0.0182 | 0.4081 |
| Power (kJ/kg)  | 3.0760382 |        |        |

### **Selective Separation of olefins and paraffins**

One additional alternative considered is the separation of the olefins (hexene, heptene, octene) for their use as solvents or plasticizers. The separation of the olefins from paraffins is assumed to be carried out with the same consumptions as for pentene.

#### **S-1.10.9 Power production**

Light fractions (<C4) can also be burned to produce power sold to the power network. A Brayton cycle using a gas turbine is considered for generating power from gases. The summary of the CAPEX is provided in Table S-33. The CAPEX is estimated as a function of the power generated. No other OPEX is considered in the operation of the Brayton turbine. Power is computed as a function of the Brayton cycle efficiency and the LHV of the fuel burned as described in Eq. (S-9).

$$W = \eta_{Brayton} \sum_{i=1}^{i=Products} LHV_i \cdot F_i \quad (S-9)$$

**Table S-33.** Summary of consumptions and function for CAPEX estimation for the production of power by burning light paraffins.

| <b>CAPEX=a*W[MW]^b</b> |          |
|------------------------|----------|
| <b>a</b>               | <b>b</b> |
| 1.8374·10 <sup>6</sup> | 0.5889   |

#### **S-1.10.10 Reforming of light olefins and paraffins.**

A last alternative considered for the use of paraffins. The conversion of all the products is assumed to be the same as for methane. The energy required in the reforming process is assumed to be only the one in the difference of formation enthalpies between the CO and H<sub>2</sub> generated, and the formation enthalpy of the raw material. It is assumed that the energy required in heating the inlet to 950 °C is integrated with the hot inlet, leaving the reactor that needs to be cooled down. The Capex is estimated as for methane, where with the parameters of Table S-34.

**Table S-34.** Summary of function for CAPEX estimation for the reforming of light paraffins.

| <b>CAPEX=a*W[MW]^b</b> |          |
|------------------------|----------|
| <b>a</b>               | <b>b</b> |
| 0.0219                 | 0.864    |

#### **S-1.11 Chemical recycling for recovery of LDPE from multilayer plastics.**

A last alternative considered is the selective recovery of the polymer after its extraction from a multilayer plastic. In the process that we have modeled, we focus on the recovery

of the LDPE presented in multilayer plastics. Toluene is initially employed for dissolving PE and then, acetone is employed as an antisolvent for isolating the PE. Finally, toluene is separated from acetone by distillation and recycled.<sup>66</sup> The process is presented in Figure S-34. After recovering PE, it needs to be sent to an extruder. Since the extruder is not available in Aspen Plus, it is computed offline. A summary of the consumptions and the parameters of the CAPEX function are given in Table S-35.

**Table S-35.** Summary of consumptions and function for CAPEX estimation for the recovery of PE with the solvent-antisolvent process.

| Type            | Consumption | CAPEX  |        |
|-----------------|-------------|--------|--------|
|                 |             | a      | b      |
| Ref (kcal/kg)   | 86.7        | 0.0204 | 0.9305 |
| Heat (kcal/kg)  | 84          |        |        |
| Power (kJ/kg)   | 0           |        |        |
| Toluene (kg/kg) | 0.0035      |        |        |
| Acetone (kg/kg) | 0.017       |        |        |

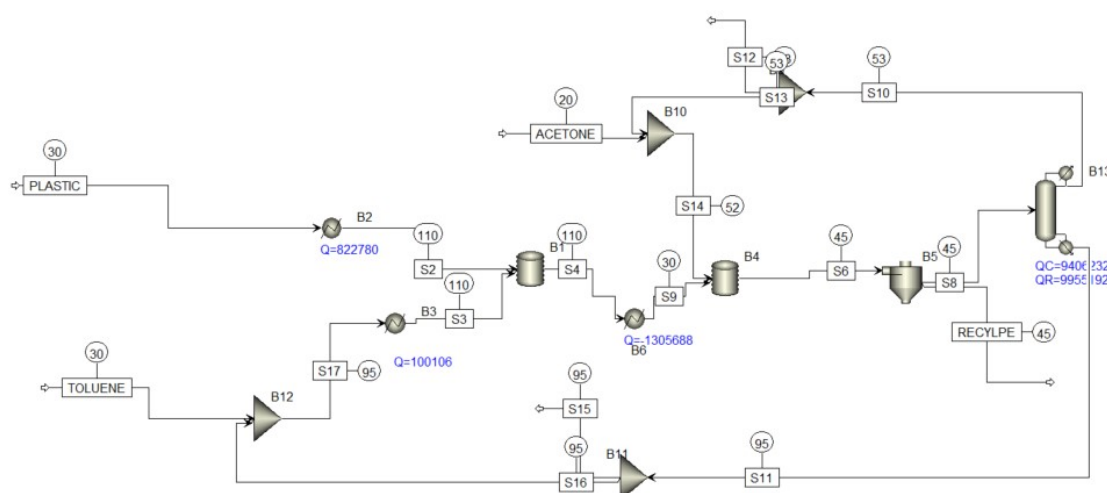

**Figure S-34.** Aspen process model for the selective separation of polyethylene from plastic waste. Note that an extruder is necessary after PE is separated from the plastic waste.

## **S-2. GENERAL ASSUMPTIONS IN THE TECHNOECONOMIC ANALYSIS.**

The following assumptions are considered in the estimation of the OPEX and CAPEX in the superstructure:

- The recovery period of the CAPEX of the plants is assumed to be 10 years.
- Costs are determined based on the 2021 price basis. The costs are updated to 2021 with the Chemical Engineering Plant Cost Index of the Chemical Engineering journal.<sup>67</sup>

- The estimation of the CAPEX of the entire facility including yard, piping, electrical installation, contracts, etc. is determined from the cost of the main components of the process following the factors provided in Peters and Timmerhaus.<sup>5</sup>
- The cost employed in the prices obtained for products, raw materials, and utilities are summarized with their references in Table S-36.
- The utilities are assumed to cost \$7/MMBTU for natural gas, \$0.072/kWh for electricity, and \$2.1/ton for refrigerating water. The efficiency of natural gas furnaces is 75%, and the efficiency in generating steam in a boiler is 85%. The electricity is supplied directly. Water is assumed to be internally recycled in the refinery, with losses in the refrigeration tower estimated at 10%. A temperature difference of 10 °C is assumed in the refrigeration circuit.

**Table S-36.** Summary of components, costs, and their references.

| <b>Component</b>                                                      | <b>Price</b>   |
|-----------------------------------------------------------------------|----------------|
| Heat from Nat Gas <sup>68</sup>                                       | \$6.6/MMBTU    |
| Electricity <sup>69</sup>                                             | \$0.072/kWh    |
| Refrigeration water <sup>70</sup>                                     | \$2.1/ton      |
| Ferric chloride in pretreatment <sup>2</sup>                          | 0.538 (\$/kg)  |
| NaOH <sup>71</sup>                                                    | 0.626 (\$/kg)  |
| Polyelectrolyte, starch <sup>72</sup>                                 | 0.725 (\$/kg)  |
| Low Density Polyethylene (non-degraded) <sup>73</sup>                 | 1.38 (\$/kg)   |
| Natural gas <sup>68</sup>                                             | 6.6 (\$/MMBTU) |
| Propane <sup>74</sup>                                                 | 2.983 (\$/gal) |
| C5-C10 Paraffins as gasoline <sup>75</sup>                            | 4.44 (\$/gal)  |
| C11-C19 paraffins as Diesel <sup>75</sup>                             | 5.57 (\$/gal)  |
| >C20 paraffins as Jet Fuel <sup>76</sup>                              | 6.95 (\$/gal)  |
| Hydrogen <sup>77</sup>                                                | 2.1 (\$/kg)    |
| Methanol <sup>78</sup>                                                | 0.529 (\$/kg)  |
| Lube oil. <sup>79</sup>                                               | 1.6 (\$/kg)    |
| LAB, Surfactants <sup>80</sup>                                        | 2.08 (\$/kg)   |
| Acetaldehyde <sup>81</sup>                                            | 2.4 (\$/kg)    |
| Ethanol <sup>82</sup>                                                 | 0.998 (\$/kg)  |
| Propanal, assumed as acetaldehyde                                     | 2.4 (\$/kg)    |
| Ethylene oxide <sup>83</sup>                                          | 1.251 (\$/kg)  |
| Polypropylene <sup>84</sup>                                           | 2.02 (\$/kg)   |
| Butanal <sup>85</sup>                                                 | 2.49(\$/kg)    |
| Acetone <sup>86</sup>                                                 | 1.1 (\$/kg)    |
| Propanol, assumed as iso-propyl-alcohol <sup>87</sup>                 | 1.662 (\$/kg)  |
| Acrylonitrile <sup>88</sup>                                           | 1.525 (\$/kg)  |
| HCN <sup>89,90</sup> (Updated with cost index from EPA report)        | 2.952 (\$/kg)  |
| Acrylic acid <sup>91</sup>                                            | 1.523 (\$/kg)  |
| Polybutylene <sup>92</sup>                                            | 2.125 (\$/kg)  |
| Butanol <sup>93</sup>                                                 | 2.252 (\$/kg)  |
| SBR <sup>94</sup>                                                     | 3.288 (\$/kg)  |
| Pentanal, valeraldehyde                                               | 5.5 (\$/kg)    |
| Hexanal to nonanal, as aldehydes for cyclic polymers <sup>95,96</sup> | 8.5 (\$/kg)    |

|                                                                           |               |
|---------------------------------------------------------------------------|---------------|
| Hexane and hexene (as separated fractions), solvents. <sup>97</sup>       | 2.158 (\$/kg) |
| Heptane, heptene, octane and octene (as separated fraction) <sup>98</sup> | 2.434 (\$/kg) |
| Benzene used in LAB <sup>99</sup>                                         | 1.827 (\$/kg) |
| Styrene used is SBR <sup>94</sup>                                         | 1.650 (\$/kg) |
| NH <sub>3</sub> <sup>100</sup>                                            | 0.664 (\$/kg) |
| Oxygen <sup>101</sup>                                                     | 0.1 (\$/kg)   |
| Purified water <sup>102</sup>                                             | 0.03 (\$/kg)  |

### **S-3. GENERAL ASSUMPTIONS IN THE LIFE CYCLE ASSESSMENT**

Life Cycle Assessment (LCA) is performed to determine the uses of plastic waste that have the best environmental performance attending to two objectives: On the one hand, the study aims to determine the superstructure that has the highest decarbonization potential at 100 years measured as Global Warming Potential – 100 (GWP100). On the other hand, an objective function is defined to minimize the impact on the environment by minimizing the impact on the Ecosystems quality of the Recipe method.<sup>103</sup> In the estimation of these two indicators, the following approaches are considered:

- Emissions are only computed considering the fluxes of each of the processes. The construction of the facilities, the catalysts, and other fixed materials are not considered in the LCA study.
- System expansion method is used for computing the emissions. The products generated are substituted with an oil-based product as basis. The boundaries of the system are simplified in Figure S-35. In this system expansion approach, the products obtained from the plastic-based refinery design are substituted by petrol-based products. A summary of the products considered for substitution is given in Table S-37.
- All the emissions factors for the products substituted, raw materials, and utilities are taken from Ecoinvent, with the products used for substitution to be those given in Table S-37.



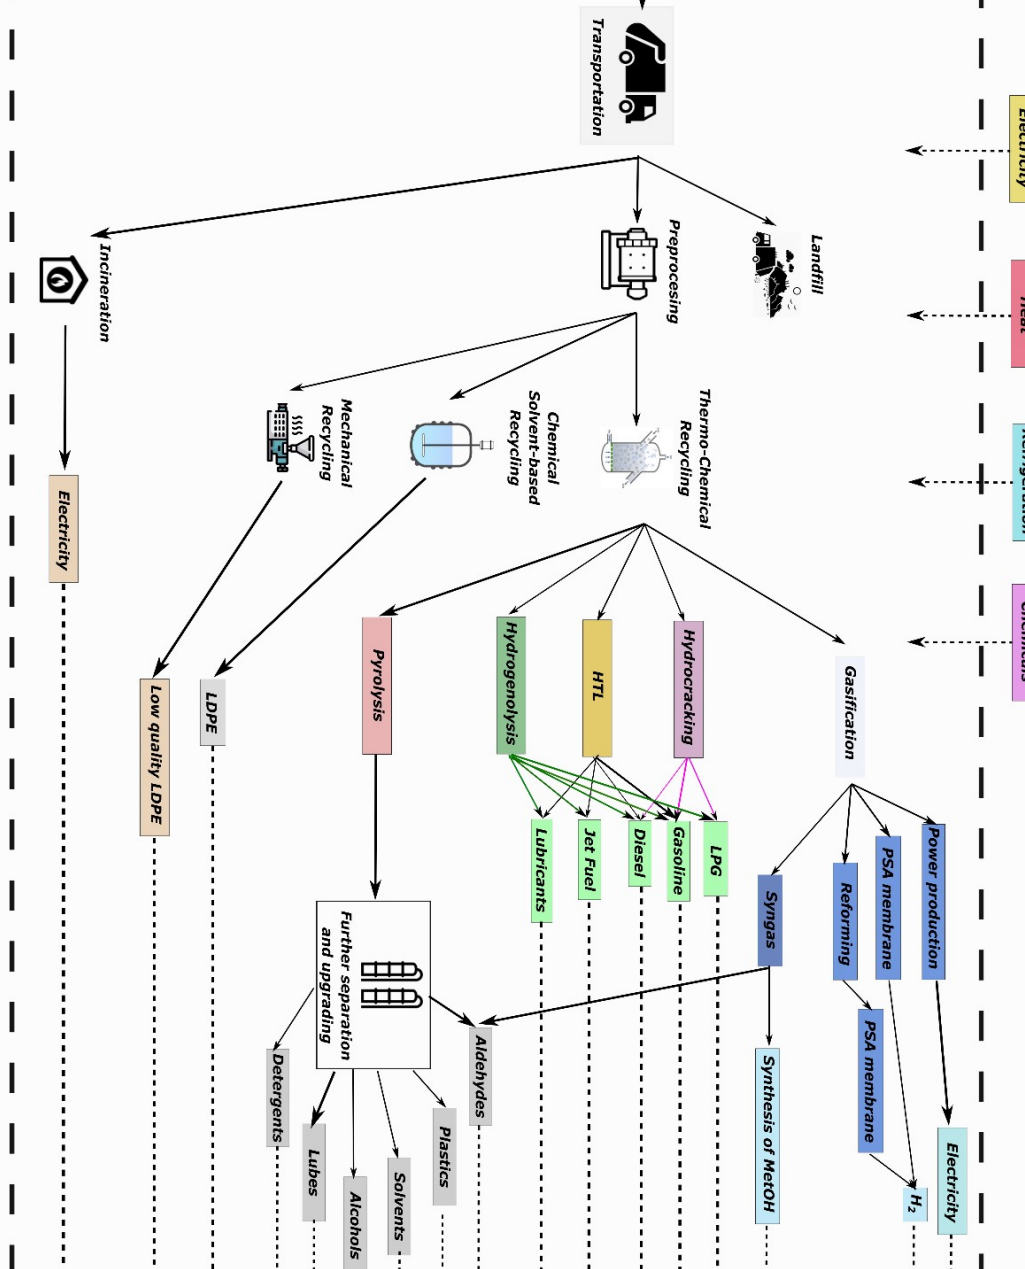

Figure S-35. Boundaries considered in the system expansion study are defined for the LCA.

Table S-37. References for raw materials, utilities and goods substituted in the LCA.

| Component                               | Component Equivalent                                                |
|-----------------------------------------|---------------------------------------------------------------------|
| Heat from Nat Gas                       | Market for natural gas                                              |
| Electricity                             | Market for electricity REFC- US                                     |
| Refrigeration water                     | Market for tap water, Rest of the World                             |
| Ferric chloride in pretreatment         | Iron (III) chloride production, without water, in 12% iron solution |
| NaOH                                    | Market for sodium hydroxide, without water, in 50% solution state   |
| Polyelectrolyte, starch                 | Maize starch production                                             |
| Low Density Polyethylene (non-degraded) | Market for polyethylene, low density, granulate                     |
| Natural gas                             | Market for natural gas, high pressure, US                           |
| Propane                                 | Market for propane                                                  |
| C5-C10 Paraffins as gasoline            | Market for petrol, unleaded                                         |

|                                                      |                                                                                             |
|------------------------------------------------------|---------------------------------------------------------------------------------------------|
| C11-C19 paraffins as Diesel                          | Diesel production, petroleum refinery operation                                             |
| >C20 paraffins as Jet Fuel                           | Diesel production, petroleum refinery operation                                             |
| Hydrogen                                             | Hydrogen production, gaseous, petroleum refinery operation                                  |
| Methanol                                             | Market for methanol                                                                         |
| Lube oil.                                            | Base oil production, petroleum refinery operation                                           |
| LAB, Surfactants                                     | Alkylbenzene production, linear                                                             |
| Acetaldehyde                                         | Market for acetaldehyde                                                                     |
| Ethanol                                              | Ethanol production from maize                                                               |
| Propanal                                             | Market for propanal                                                                         |
| Ethylene oxide                                       | Market for ethylene oxide                                                                   |
| Polypropylene                                        | Market for polypropylene, granulate                                                         |
| Butanal                                              | Hydroformylation of propylene                                                               |
| Acetone                                              | Market for acetone, liquid                                                                  |
| Propanol, assumed as iso-propyl-alcohol              | Isopropanol production                                                                      |
| Acrylonitrile                                        | Sohio process, acrylonitrile                                                                |
| HCN (Updated with cost index from EPA report)        | Hydrogen cyanide production                                                                 |
| Acrylic acid                                         | Acrylic acid production                                                                     |
| Polybutylene                                         | Market for butene                                                                           |
| Butanol                                              | 2-butanol production by hydration of butene                                                 |
| SBR                                                  | Latex production.                                                                           |
| Pentanal, valeraldehyde                              | Hydroformylation of butene                                                                  |
| Hexanal to nonanal, as aldehydes for cyclic polymers | **Assumed as hydroformylation of butene.                                                    |
| Hexane                                               | Market for hexane                                                                           |
| Heptane                                              | Market for heptane                                                                          |
| Octane                                               | **Assumed as heptane.                                                                       |
| Hexene                                               | **Assumed as hexane                                                                         |
| Heptene                                              | **Assumed as heptane                                                                        |
| Octene                                               | **Assumed as heptane                                                                        |
| Benzene used in LAB                                  | Benzene production                                                                          |
| Styrene used is SBR                                  | Market for styrene                                                                          |
| NH <sub>3</sub>                                      | Market for ammonia, anhydrous, liquid                                                       |
| Oxygen                                               | Air separation, cryogenic, oxygen, liquid.                                                  |
| Purified water                                       | Water production, ultrapure, US                                                             |
| Landfill operation                                   | Treatment of waste plastic, mixture, unsanitary landfill, moist infiltration class (300 mm) |

#### **S-4. MODEL DESCRIPTION**

##### **S-4.1. Model formulation**

All the surrogate models of the processes have been included in the MINLP optimization problem for selecting the optimal process attending to economic and GWP objectives. In the MINLP model, the processes are represented by two sets denoted as,  $i$  and  $k$ . The fluxes are represented by arcs between the sets of processes as  $F_{i,k}$ . The flux of each component getting into each of the processes,  $f_{j,i,k}$  is employed for determining the outflow of the products as a function of the inflow of the principal reactant denoted by the index “*react*” getting into the process  $k$ , see (Eq. S-10). The inert components are not assumed to react. The flow of raw materials consumption,  $f_{raw\ mat}$  is also determined as given in Eq. (S-11) as a function of the principal reactant “*react*” multiplied by a parameter,  $a_{raw\ mat}$ . The utilities consumption is determined as a function of the total inflow,  $F_{i,k}$ , get into each process  $k$ , multiplied by a parameter,  $a_{util}$ , as given in Eq. (S-12).

$$f_{j,i,k} = yield_{react, j} \cdot f_{react, k} \quad (S-10)$$

$$f_{raw\ mat} = a_{raw\ mat} \cdot f_{react, k} \quad (S-11)$$

$$C_{util} = a_{util} \cdot F_{i,k} \quad (S-12)$$

Similarly, the Capex is computed for each of the units following a piecewise linear model with 5 cuts denoted by the index “ $z$ ”, implemented into the MINLP formulation as given in Eq. (S-13) to Eq. (S-17). The CAPEX of each of the units is computed as the sum of the CAPEX determined in each of the cuts, Eq. (S-13). In Eq. (S-13),  $Cap_z$ , corresponds to the CAPEX in each of the cuts and  $\alpha_z$  is a positive continuous variable to select the value according to a flux. This selection of  $\alpha_z$  is made based on the flux as given in Eq. (S-14), where the collocation points of the flux are given as  $\gamma_z$ . The sum continuous variables for selecting the collocation,  $\alpha_z$ , must be restricted to 1, Eq. (S-15). Furthermore, it is necessary to implement the constrain that: at most two of the  $\alpha_z$  must be positive. This is carried out by utilizing a binary variable,  $y_z$  that selects the  $\alpha_z$  depending on the cut as given in Eq. (S-16). Eq. (S-17) indicates that only one region can be selected.

$$Capex_k = \sum_{z=1}^{z=5} Cap_z \cdot \alpha_z \quad (S-13)$$

$$F_{i,k} = \sum_{z=1}^{z=5} \gamma_z \cdot \alpha_z \quad (S-14)$$

$$\sum_{z=1}^5 \alpha_z = 1 \quad (S-15)$$

$$\begin{aligned} \text{if } z = 1: & \quad \alpha_z \leq y_z \\ \text{if } 1 < z < 5: & \quad \alpha_z \leq y_z + y_{z-1} \\ \text{if } z = 5: & \quad \alpha_z \leq y_{z-1} \end{aligned} \quad (S-16)$$

$$\sum_{z=1}^5 y_z = 1 \quad (\text{S-17})$$

Among the set of processes, the subset of separators is employed for dividing the stream and selecting the appropriate path among the different options. The multiple alternatives that can be selected are modeled employing a separation fraction,  $f_{sep,l}$ , that divides the flow into its multiple alternatives,  $l$ , as shown in Eq. (S-18). The sum of fractions must meet the condition of being equal to 1, as given in Eq. (S-19). Although the selection of multiple alternatives can be achieved with other formulations in the form of a MILP problem (e.g. Mc-Cormick formulation), this work aims to allow the system to select two or more technologies simultaneously. Since the number of separators employed is high and more than two options can be selected, an MINLP formulation has been used.

$$\sum_{l=1}^{unit} F_{l,k} = F_{i,l} \cdot f_{sep,l} \quad (\text{S-18})$$

$$\sum_{l=1}^{units} f_{sep,l} = 1 \quad (\text{S-19})$$

Apart from these specifications, the components produced in pyrolysis and gasification are tracked in downstream operations as component fluxes. The composition is introduced in the pyrolysis as a parameter set. This allows to compute the fluxes of each component. The fluxes of each component are tracked downstream. This can be done since there are no mixers to change the flow composition. Only the overall flux is computed downstream as given in Eq. (S-20). This overall flux is employed in computing the CAPEX as shown in previous Eq. (S-14).

$$F_{i,k} = \sum_{j=1}^{j=N_{comp}} f_{j,i,k} \quad (\text{S-20})$$

#### **S-4.1. Objective functions**

The MINLP problem is optimized by employing two objective functions employing Baron as a solver. On the one hand, an economic objective function determines the superstructure that maximizes the profit, Eq. (S-21). The profit is defined as the income minus the costs, where the income is computed considering all the products produced as seen in Eq. (S-22). The costs are computed as the sum of the amortization costs computed from the CAPEX, plus the costs of the raw materials and utilities, see Eq. (S-23).

$$\max_{j \in Products} (Profit) = \max (Income - Costs) \quad (\text{S-21})$$

$$Income = \sum_{j=1} f_j \cdot P_j \quad (\text{S-22})$$

$$\begin{aligned}
Costs = & \sum_{k=1}^{Units} W_k \cdot P_{power} + \sum_{k=1}^{Units} Q_k \cdot P_{heat} + \sum_{k=1}^{Units} Q_{kref} \cdot P_{Ref} \\
& + \sum_{k=1}^{UnitsRawMat} \sum_i f_{j,k} \cdot P_j + \sum_{k=1}^{Units} Capex_k
\end{aligned} \tag{S-23}$$

The environmental function, obtained from the LCA is employed for minimizing the GWP or the impact on the Ecosystems quality, see Eq. (S-24). The LCA follows a system expansion approach, and it considers two terms: the emissions generated by the continuous operation of the processes and the credits. The emissions generated are the sum of those generated by the utilities, raw material consumption, and the sorted plastic and are computed with the flows multiplied by an emission factor Eq. (S-25). The credits are computed similarly, with the flows obtained for the products.

$$GWP = Emissions - Credits \tag{S-24}$$

$$\begin{aligned}
Emissions = & \sum_{k=1}^{Units} W_k \cdot GWP_{power} + \sum_{k=1}^{Units} Q_k \cdot GWP_{heat} + \sum_{k=1}^{Units} Q_{kref} \cdot GWP_{Ref} \\
& + \sum_{k=1}^{Units} \sum_{RawMat=1}^{RawMat} f_{rawMat} \cdot GWP_{raw,mat} + GWP_{LDPE}
\end{aligned} \tag{S-25}$$

$$Credits = \sum_{j=1}^{j \in Products} f_j \cdot GWP_j \tag{S-26}$$

## **S-5 RESULTS FROM THE COMPARATIVE ANALYSIS BETWEEN MECHANICAL RECYCLING AND CHEMICAL RECYCLING BASED ON SOLVENTS**

### **S-5.1 Results for the multi-objective optimization with economic and environmental objectives.**

In the following lines, the economic and environmental results obtained from the multi-objective optimization are presented. These points correspond to the points generated by the  $\epsilon$ -constraint method between the best economic objective and the environmental objective. Furthermore, the technologies selected and a summary of the economic and environmental breakdown are provided.

**Table S-38.** Economic and environmental results obtained in the Pareto frontier.

| Point Pareto | Profit (\$/s) | GWP (kg <sub>CO2eq</sub> ./s) |
|--------------|---------------|-------------------------------|
| 1            | 3.097         | -0.953                        |
| 2            | 2.803         | -1.314                        |
| 3            | 2.649         | -1.144                        |
| 4            | 2.495         | -1.504                        |

|           |       |        |
|-----------|-------|--------|
| <b>5</b>  | 2.341 | -1.455 |
| <b>6</b>  | 2.187 | -1.617 |
| <b>7</b>  | 2.034 | -1.655 |
| <b>8</b>  | 1.88  | -1.794 |
| <b>9</b>  | 1.735 | -1.882 |
| <b>10</b> | 1.572 | -1.763 |

**Table S-39.** Depolymerization technologies selected.

| <b>Point Pareto</b> | <b>Fraction to solvent-based recycling</b> | <b>Fraction to pyrolysis</b> |
|---------------------|--------------------------------------------|------------------------------|
| <b>1</b>            | 0                                          | 1                            |
| <b>2</b>            | 0                                          | 1                            |
| <b>3</b>            | 0.0198                                     | 0.9802                       |
| <b>4</b>            | 0.0574                                     | 0.9425                       |
| <b>5</b>            | 0.3376                                     | 0.6623                       |
| <b>6</b>            | 0.4524                                     | 0.5475                       |
| <b>7</b>            | 0.6435                                     | 0.3365                       |
| <b>8</b>            | 0.7485                                     | 0.2515                       |
| <b>9</b>            | 0.9901                                     | 0.0109                       |
| <b>10</b>           | 1                                          | 0                            |

**Table S-40.** Detailed description of technologies selected for pyrolysis in the points of the Pareto.

| <b>Point</b> | <b>C1</b>               | <b>C2</b>                  | <b>C3</b> | <b>C4</b>                          | <b>C5</b>        | <b>C6</b> | <b>C7</b> | <b>C8</b> | <b>&gt;C8</b> |
|--------------|-------------------------|----------------------------|-----------|------------------------------------|------------------|-----------|-----------|-----------|---------------|
| <b>1</b>     | Nat gas                 | Isomeriz                   | Isomer.   | Isomer (55.7%),<br>Hydrof. (44.3%) | Hydroformylation |           |           | Olig      |               |
| <b>2</b>     | Nat gas                 | Wacker                     | Acetone   | Isomer (55.0%),<br>Hydrof. (45%)   | Hydroformylation |           |           | Olig      |               |
| <b>3</b>     | Nat Gas                 | Isom (88%)<br>Aceton (12%) | Acetone   | Isomer (41.0%),<br>Hydrof. (59%)   | Hydroformyl      |           | Ext. Dest | Olig      |               |
| <b>4</b>     | NG (59%)<br>Power (41%) | Isom                       | Acetone   | Isomer                             | Hydroformyl      |           | Ext. Dest | Olig      |               |

|    |                                     |        |         |             |             |           |      |
|----|-------------------------------------|--------|---------|-------------|-------------|-----------|------|
| 5  | Power                               | Wacker | Isom    | Hydroformyl |             |           | Olig |
| 6  | Power                               | Isom   | Acetone | Hydroformyl |             | Ext. Dest | Olig |
| 7  | Power                               | Isom   | Isom    | Hydroformyl |             |           | Olig |
| 8  | Power                               | Isom   | Acetone | Isom        | Hydroformyl | Ext. Dest | Olig |
| 9  | Power                               | Isom   | Hydrof  | Polybut     | Hydroformul |           | Olig |
| 10 | Solvent-Antisolvent based recycling |        |         |             |             |           |      |

**Table S-41.** Detailed breakdown of the costs in the points of the Pareto.

| Point | Costs (\$/s) |         |         | Income Products (\$/s) |           |        |       |
|-------|--------------|---------|---------|------------------------|-----------|--------|-------|
|       | Utilities    | Raw Mat | Amortiz | Lubes                  | Aldehydes | Others | LDPE  |
| 1     | 0.043        | 0.101   | 0.255   | 0.16                   | 3.275     | 0.193  | -     |
| 2     | 0.044        | 0.061   | 0.259   | 0.157                  | 2.470     | 0.180  | -     |
| 3     | 0.038        | 0.054   | 0.230   | 0.156                  | 2.505     | 0.171  | 0.034 |
| 4     | 0.041        | 0.052   | 0.224   | 0.127                  | 1.798     | 0.112  | 0.101 |
| 5     | 0.025        | 0.046   | 0.182   | 0.025                  | 1.626     | 0.183  | 0.595 |
| 6     | 0.029        | 0.065   | 0.187   | 0.022                  | 1.278     | 0.128  | 0.798 |
| 7     | 0.012        | 0.034   | 0.112   | 0.013                  | 0.828     | 0.059  | 1.135 |
| 8     | 0.010        | 0.043   | 0.091   | 0.084                  | 0.412     | 0.012  | 1.320 |
| 9     | 0.000699     | 0.024   | 0.022   | 3.94e-5                | 2e-3      | 0      | 1.746 |
| 10    | 0.000062     | 0.031   | 0.012   | -                      | -         | -      | 1.764 |

**Table S-42.** Detailed breakdown of LCA results in the points of the Pareto.

| Point | Emissions (kgCO <sub>2</sub> eq./s) |        |         | Credits (kgCO <sub>2</sub> eq./s) |           |        |       |
|-------|-------------------------------------|--------|---------|-----------------------------------|-----------|--------|-------|
|       | Power                               | Heat   | Raw Mat | Lubes                             | Aldehydes | Others | LDPE  |
| 1     | 0.22037                             | 0.1222 | 0.463   | 0.1228                            | 1.634     | 0.473  | -     |
| 2     | 0.21946                             | 0.1284 | 0.400   | 0.1228                            | 1.161     | 0.778  | -     |
| 3     | 0.19847                             | 0.1059 | 0.352   | 0.1217                            | 1.201     | 0.442  | 0.037 |
| 4     | 0.20939                             | 0.1208 | 0.314   | 0.1066                            | 0.977     | 0.360  | 0.108 |
| 5     | 0.12834                             | 0.0706 | 0.267   | 0.0819                            | 0.824     | 0.379  | 0.636 |
| 6     | 0.15229                             | 0.0847 | 0.222   | 0.0650                            | 0.557     | 0.401  | 0.853 |
| 7     | 0.07022                             | 0.0354 | 0.150   | 0.0105                            | 0.416     | 0.270  | 1.214 |
| 8     | 0.06169                             | 0.0322 | 0.108   | 0.0065                            | 0.177     | 0.401  | 1.411 |
| 9     | 0.01734                             | 0.0059 | 0.048   | 3.07e-5                           | 8.30E-04  | 0.086  | 1.867 |
| 10    | 0.01698                             | 0.0010 | 0.033   | -                                 | -         | -      | 1.886 |

**S-5.2 Results for the multi-objective optimization limiting the system to conventional technologies.**

**Table S-43.** Economic and environmental results obtained in the Pareto frontier with conventional technologies.

| <b>Point Pareto</b> | <b>Profit (\$/s)</b> | <b>GWP (kg<sub>CO2eq.</sub>/s)</b> |
|---------------------|----------------------|------------------------------------|
| 1                   | 1.401                | -0.3348                            |
| 2                   | 1.367                | -0.456                             |
| 3                   | 1.333                | -0.5222                            |
| 4                   | 1.298                | -0.5894                            |
| 5                   | 1.264                | -0.6592                            |
| 6                   | 1.229                | -0.7318                            |
| 7                   | 1.195                | -0.8035                            |
| 8                   | 1.161                | -0.869                             |
| 9                   | 1.126                | -0.9442                            |
| 10                  | 1.092                | -1.0795                            |

**Table S-44.** Depolymerization technologies selected.

| <b>Point Pareto</b> | <b>Fraction to mechanical recycling</b> | <b>Fraction to pyrolysis</b> |
|---------------------|-----------------------------------------|------------------------------|
| 1                   | 0                                       | 1                            |
| 2                   | 0.089                                   | 0.911                        |
| 3                   | 0.185                                   | 0.815                        |
| 4                   | 0.282                                   | 0.718                        |
| 5                   | 0.374                                   | 0.626                        |
| 6                   | 0.489                                   | 0.511                        |
| 7                   | 0.594                                   | 0.406                        |
| 8                   | 0.310                                   | 0.690                        |
| 9                   | 0.800                                   | 0.200                        |
| 10                  | 1                                       | 0                            |

**Table S-45.** Detailed description of technologies selected in the points of the Pareto with conventional technologies.

| <b>Poi nt</b> | <b>C1</b> | <b>C2</b> | <b>C3</b> | <b>C4</b>  | <b>C5</b> | <b>C6</b>        | <b>C7</b> | <b>C8</b> | <b>&gt;C8</b> |
|---------------|-----------|-----------|-----------|------------|-----------|------------------|-----------|-----------|---------------|
| 1             | Nat. Gas. | Isom      | Isom      | Hydroform. |           | Extract. Distill | Hydroform | Olig      |               |



|           |                      |      |      |            |                     |           |      |
|-----------|----------------------|------|------|------------|---------------------|-----------|------|
| <b>2</b>  | Nat.<br>Gas.         | Isom | Isom | Hydroform. | Extract.<br>Distill | Hydroform | Olig |
| <b>3</b>  | Nat.<br>Gas.         | Isom | Isom | Hydroform. | Extract.<br>Distill | Hydroform | Olig |
| <b>4</b>  | Nat.<br>Gas.         | Isom | Isom | Hydroform. | Extract.<br>Distill | Hydroform | Olig |
| <b>5</b>  | Nat.<br>Gas.         | Isom | Isom | Hydroform. | Extract.<br>Distill | Hydroform | Olig |
| <b>6</b>  | Nat.<br>Gas.         | Isom | Isom | Hydroform. | Extract.<br>Distill | Hydroform | Olig |
| <b>7</b>  | Nat.<br>Gas.         | Isom | Isom | Hydroform. | Extract.<br>Distill | Hydroform | Olig |
| <b>8</b>  | Nat.<br>Gas.         | Isom | Isom | Hydroform. | Extract.<br>Distill | Hydroform | Olig |
| <b>9</b>  | Nat.<br>Gas.         | Isom | Isom | Hydroform. | Extract.<br>Distill | Hydroform | Olig |
| <b>10</b> | Mechanical Recycling |      |      |            |                     |           |      |

**Table S-46.** Detailed breakdown of the costs in the points of the Pareto with conventional technologies.

| Point     | Costs (\$/s) |         |         | Income Products (\$/s) |           |         |        |
|-----------|--------------|---------|---------|------------------------|-----------|---------|--------|
|           | Utilities    | Raw Mat | Amortiz | Lubes                  | Aldehydes | Others  | LDPE   |
| <b>1</b>  | 0.03         | 0.027   | 0.150   | 0.1695                 | 1.113     | 0.3255  | 0      |
| <b>2</b>  | 0.027        | 0.027   | 0.140   | 0.1695                 | 0.904     | 0.3895  | 0.0534 |
| <b>3</b>  | 0.025        | 0.024   | 0.132   | 0.1335                 | 0.809     | 0.3665  | 0.111  |
| <b>4</b>  | 0.021        | 0.021   | 0.123   | 0.1335                 | 0.712     | 0.3065  | 0.1692 |
| <b>5</b>  | 0.012        | 0.018   | 0.113   | 0.117                  | 0.611     | 0.273   | 0.2244 |
| <b>6</b>  | 0.015        | 0.015   | 0.100   | 0.0945                 | 0.507     | 0.2185  | 0.2934 |
| <b>7</b>  | 0.012        | 0.012   | 0.089   | 0.075                  | 0.403     | 0.175   | 0.3564 |
| <b>8</b>  | 0.009        | 0.01    | 0.078   | 0.057                  | 0.305     | 0.131   | 0.186  |
| <b>9</b>  | 0.006        | 0.00567 | 0.065   | 0.036                  | 0.198     | 0.087   | 0.48   |
| <b>10</b> | 8.4e-5       | 0       | 0.011   | 0                      | 0.00E+00  | 1.25e-6 | 0.6    |

**Table S-47.** Detailed breakdown of LCA results in the points of the Pareto with conventional technologies.

| Point | Emissions (kg <sub>CO2eq./s</sub> ) |       |          | Credits (kg <sub>CO2eq./s</sub> ) |           |        |       |
|-------|-------------------------------------|-------|----------|-----------------------------------|-----------|--------|-------|
|       | Power                               | Heat  | Raw Mat  | Lubes                             | Aldehydes | Others | LDPE  |
| 1     | 0.050                               | 0.254 | 1.85E-01 | 0.1322                            | 0.534     | 0.352  | 0     |
| 2     | 0.047                               | 0.232 | 1.66E-01 | 0.1065                            | 0.44      | 0.315  | 0.096 |
| 3     | 0.044                               | 0.208 | 1.49E-01 | 0.1041                            | 0.393     | 0.277  | 0.201 |
| 4     | 0.041                               | 0.183 | 1.31E-01 | 0.1006                            | 0.346     | 0.275  | 0.306 |
| 5     | 0.038                               | 0.160 | 1.14E-01 | 0.0913                            | 0.298     | 0.253  | 0.405 |
| 6     | 0.034                               | 0.130 | 9.30E-02 | 0.0737                            | 0.246     | 0.197  | 0.530 |
| 7     | 0.031                               | 0.104 | 7.40E-02 | 0.0585                            | 0.196     | 0.157  | 0.644 |
| 8     | 0.027                               | 0.079 | 5.80E-02 | 0.0445                            | 0.148     | 0.119  | 0.336 |
| 9     | 0.024                               | 0.052 | 3.70E-02 | 0.0281                            | 0.096     | 0.077  | 0.867 |
| 10    | 0.017                               | 0.001 | 7.15E-05 | 0                                 | 0         | 0      | 1.084 |

**Estimations for the different regions defined by the OECD employed for comparison.**

The Pareto front with conventional and process intensification technologies has been compared with the current cost and emissions of the plastic waste management sites. The estimation of these costs and emissions has been performed employing previous correlations and the data from the OECD for different regions of the world.<sup>104</sup> The data contains the fraction of plastic waste sent to each of the management technologies and the mismanaged fraction. This mismanaged fraction is assumed to have the same cost and emissions as the plastic going to landfills. As a result, the fractions sent to each technology are those reported in Table S-48.

**Table S-48.** Fraction of plastic waste sent to each technology in the OECD regions.

| Region             | Fraction to mechanical recycling | Fraction to incineration | Fraction to landfill |
|--------------------|----------------------------------|--------------------------|----------------------|
| US                 | 0.04                             | 0.16                     | 0.80                 |
| Canada             | 0.06                             | 0.04                     | 0.89                 |
| Other OECD America | 0.10                             | 0.005                    | 0.885                |
| OECD European      | 0.14                             | 0.44                     |                      |

|                                 |       |       |       |
|---------------------------------|-------|-------|-------|
| Union                           |       |       | 0.42  |
| Other OECD Europe               | 0.08  | 0.23  | 0.69  |
| OECD Oceania                    | 0.07  | 0.12  | 0.81  |
| OECD Asia                       | 0.12  | 0.72  | 0.16  |
| OECD Avg                        | 0.09  | 0.29  | 0.62  |
| China                           | 0.13  | 0.24  | 0.63  |
| India                           | 0.13  | 0.04  | 0.83  |
| Latin America                   | 0.1   | 0.01  | 0.89  |
| Middle East and<br>North Africa | 0.05  | 0.01  | 0.94  |
| Other Africa                    | 0.06  | 0.01  | 0.93  |
| Other EU                        | 0.065 | 0.03  | 0.905 |
| Other Eurasia                   | 0.05  | 0.015 | 0.935 |
| Other non-OECD<br>Asia          | 0.09  | 0.04  | 0.87  |

This fraction is used to determine the costs and emissions involved in each of the processes. The costs and emissions are determined with the models presented in previous sections for mechanical recycling, incineration, and landfill. To estimate the costs the following assumptions are made:

- Only the operating costs are considered. Since the location and number of plants cannot be determined with the current model, the capital costs are not included.
- Similarly, no other costs are involved in the estimation (e.g. labor costs, taxes, maintenance).
- All the costs employ the prices defined in the previous section. There is no geographical variation of the costs.

Similarly, the GWP in each of the locations is determined based only on the emissions involved in the operation of the process. The geographically specific emissions of each location have not been considered. The emissions involved in the collection of plastic waste and the distribution of the products are also not included. The results obtained for each of the locations for the profitability, value generated, and GWP are presented in Table S-49.

**Table S-49.** Estimation of costs and emissions for the different regions defined by the OECD.

| Region                       | GWP (CO <sub>2eq</sub> /kg <sub>LDPE</sub> ) | Value Generated (\$/kg <sub>LDPE</sub> ) |
|------------------------------|----------------------------------------------|------------------------------------------|
| US                           | 0.47523338                                   | -0.01449                                 |
| Canada                       | 0.30873582                                   | 0.00801                                  |
| Other OECD America           | 0.23300197                                   | 0.0499025                                |
| OECD Eunion                  | 0.77798632                                   | 0.07928                                  |
| Other OECD Europe            | 0.54660619                                   | 0.023135                                 |
| OECD Oceania                 | 0.41251496                                   | 0.01516                                  |
| OECD Asia                    | 1.16083416                                   | 0.05164                                  |
| OECD Avg                     | 0.62106297                                   | 0.031325                                 |
| China                        | 0.52257782                                   | 0.07413                                  |
| India                        | 0.25973522                                   | 0.07923                                  |
| Latin America                | 0.24261113                                   | 0.049245                                 |
| Middle East and North Africa | 0.27978163                                   | -0.002005                                |
| Other Africa                 | 0.27234753                                   | 0.008245                                 |
| Other EU                     | 0.29491474                                   | 0.01286                                  |
| Other Eurasia                | 0.2863527                                    | -0.0021325                               |
| Other non-OECD Asia          | 0.28947162                                   | 0.03823                                  |

### **S-5.3 Evaluation with mechanical recycling.**

In order to determine the maximum number of recycling loops that can make mechanical recycling more sustainable than solvent-based recycling sensitivity analysis was performed. In the sensitivity analysis, an increasing number of recycling loops that the material can resist is considered, see Table S-50. Since degradation per loop is lower with more cycles, the price also increases, see Table S-50. Recycling the LDPE more times also saves a higher fraction of emissions, Eq. (S-27). The evaluation of different values for the maximum number of loops does not select mechanical recycling until LDPE can resist 6 recycling loops of mechanical recycling. The results obtained for the Pareto with this limit of 6 recycling loops in mechanical recycling are presented in Tables S-51 to S-55.

$$Price_{Degraded\ LDPE} = \left(1 - \frac{1}{N_{Loops}}\right) P_{LDPE\ Virgin} \quad (S-27)$$

**Table S-50.** Economic and environmental results obtained in the Pareto frontier.

| Maximum | Price LDPE recovered | Credits LDPE Recovered |
|---------|----------------------|------------------------|
|---------|----------------------|------------------------|

| Number loops | (\$/kg <sub>LDPE</sub> ) | (kg <sub>CO2</sub> /kg <sub>LDPE</sub> ) |
|--------------|--------------------------|------------------------------------------|
| 2            | 0.9                      | 1.08                                     |
| 3            | 1.199                    | 1.44                                     |
| 4            | 1.35                     | 1.62                                     |
| 5            | 1.44                     | 1.728                                    |
| 6            | 1.596                    | 1.8                                      |

**Table S-51.** Economic and environmental results obtained in the Pareto frontier with LDPE being recycled up to 6 times in mechanical recycling.

| Point Pareto | Profit (\$/s) | GWP (kg <sub>CO2eq./s</sub> ) |
|--------------|---------------|-------------------------------|
| 1            | 3.097         | -0.953                        |
| 2            | 2.957         | -1.081                        |
| 3            | 2.803         | -1.314                        |
| 4            | 2.649         | -1.144                        |
| 5            | 2.495         | -1.504                        |
| 6            | 2.341         | -1.455                        |
| 7            | 2.187         | -1.617                        |
| 8            | 2.034         | -1.655                        |
| 9            | 1.88          | -1.794                        |
| 10           | 1.735         | -1.882                        |
| 11           | 1.572         | -1.763                        |

**Table S-52.** Fraction sent to each depolymerization technologies selected.

| Point Pareto | Fraction to mechanical recycling | Fraction to pyrolysis |
|--------------|----------------------------------|-----------------------|
| 1            | -                                | 1                     |
| 2            | -                                | 1                     |
| 3            | -                                | 1                     |
| 4            | 0.05                             | 0.95                  |
| 5            | 0.11                             | 0.89                  |
| 6            | 0.33                             | 0.67                  |
| 7            | 0.467                            | 0.553                 |
| 8            | 0.73                             | 0.26                  |
| 9            | 0.97                             | 0.034                 |
| 10           | 0.999                            | 0.001                 |
| 11           | 1                                | 0                     |

**Table S-53.** Detailed description of technologies selected in the points of the Pareto with LDPE being recycled up to 6 times in mechanical recycling.

| Poi<br>nt | C1                   | C2                              | C3                                 | C4                                | C5         | C6 | C7             | C8 | >C8   |
|-----------|----------------------|---------------------------------|------------------------------------|-----------------------------------|------------|----|----------------|----|-------|
| 1         | Nat.<br>Gas          | Wacker<br>(84%),<br>Isom<br>16% | Isom                               | Isom (55%),<br>Hydroform<br>(45%) | Hydroform. |    |                |    | Lubes |
| 2         | Nat<br>Gas           | Wacker                          | Acetone<br>(25%),<br>Isom<br>(75%) | Isom (45%)<br>Hydroform<br>(55%)  | Hydroform. |    |                |    | Lubes |
| 3         | Nat.<br>Gas          | Wacker                          | Acetone                            | Isom (59%),<br>hydroform<br>(41%) | Hydroform. |    |                |    | Lubes |
| 4         | Nat.<br>Gas          | Isom                            | Isom<br>(88%),<br>acetone<br>(12%) | Isom (41%),<br>hydroform<br>(59%) | Hydroform. |    | Ext.<br>Distil |    | Lubes |
| 5         | Nat.<br>Gas          | Isom                            | Acetone                            | Isom                              | Hydroform. |    | Ext.<br>Distil |    | Lubes |
| 6         | Nat.<br>Gas          | Wacker                          | Isom<br>(41%),<br>acetone<br>(59%) | Hydroform.                        |            |    |                |    | Lubes |
| 7         | Power                | Isom                            | Acetone                            | Isom (96%)                        | Hydroform  |    | Ext.<br>Distil |    | Lubes |
| 8         | Nat<br>Gas           | Isom                            | Isom                               | Hydroform.                        |            |    |                |    | Lubes |
| 9         | Power                | Et. Oxide                       | Acetone                            | Isom                              | Hydroform. |    | Ext.<br>Distil |    | Lubes |
| 9         | Power                | Isom                            | Acetone                            | Polybutylen<br>e                  | Hydroform. |    |                |    | Lubes |
| 11        | Mechanical Recycling |                                 |                                    |                                   |            |    |                |    |       |

**Table S-54.** Detailed breakdown of the costs in the points of the Pareto with LDPE being recycled up to 6 times in mechanical recycling.

|  | Costs (\$/s) | Income Products (\$/s) |
|--|--------------|------------------------|
|--|--------------|------------------------|

| Point | Utilities | Raw Mat | Amortiz | Lubes  | Aldehydes | Others | LDPE  |
|-------|-----------|---------|---------|--------|-----------|--------|-------|
| 1     | 0.043     | 0.072   | 0.255   | 0.16   | 3.468     | 0.133  | -     |
| 2     | 0.043     | 0.066   | 0.263   | 0.16   | 3.327     | 0.127  | -     |
| 3     | 0.044     | 0.038   | 0.259   | 0.157  | 3.15      | 0.147  | 0.079 |
| 4     | 0.038     | 0.083   | 0.230   | 0.156  | 2.776     | 0.122  | 0.175 |
| 5     | 0.041     | 0.052   | 0.224   | 0.117  | 2.71      | 0.115  | 0.526 |
| 6     | 0.025     | 0.068   | 0.182   | 0.255  | 1.906     | 0.114  | 0.526 |
| 7     | 0.029     | 0.065   | 0.187   | 0.025  | 1.809     | 0.107  | 0.745 |
| 8     | 0.012     | 0.05    | 0.112   | 0.013  | 0.887     | 0.076  | 1.165 |
| 9     | 0.01      | 0.043   | 0.091   | 0.008  | 0.624     | 0.045  | 1.548 |
| 10    | 6.9e-4    | 0.024   | 0.022   | 3.9e-4 | 2e-3      | 0.001  | 1.594 |
| 11    | 1.2e-4    | 0.002   | 0.012   | 0      | 0         | 0      | 1.596 |

**Table S-55.** Detailed breakdown of LCA results in the points of the Pareto with LDPE being recycled up to 6 times in mechanical recycling.

| Point | Emissions (kgCO <sub>2eq</sub> /s) |       |         | Credits (kgCO <sub>2eq</sub> /s) |           |         |        |
|-------|------------------------------------|-------|---------|----------------------------------|-----------|---------|--------|
|       | Power                              | Heat  | Raw Mat | Lubes                            | Aldehydes | Others  | LDPE   |
| 1     | 0.220                              | 0.122 | 0.397   | 0.351                            | 1.432     | 0.473   | -      |
| 2     | 0.223                              | 0.126 | 0.409   | 0.123                            | 1.314     | 0.688   | -      |
| 3     | 0.219                              | 0.128 | 0.400   | 0.123                            | 1.161     | 0.770   | -      |
| 4     | 0.198                              | 0.106 | 0.352   | 0.122                            | 1.2       | 0.401   | 0.09   |
| 5     | 0.209                              | 0.121 | 0.314   | 0.287                            | 0.777     | 0.588   | 0.198  |
| 6     | 0.128                              | 0.071 | 0.267   | 0.020                            | 0.824     | 0.281   | 0.594  |
| 7     | 0.152                              | 0.085 | 0.222   | 0.197                            | 0.557     | 0.491   | 0.8406 |
| 8     | 0.070                              | 0.035 | 0.150   | 0.011                            | 0.416     | 0.36    | 1.314  |
| 9     | 0.062                              | 0.032 | 0.108   | 0.066                            | 0.177     | 0.084   | 1.746  |
| 10    | 0.017                              | 0.006 | 0.048   | 3.04E-05                         | 8.30E-04  | 2.62e-5 | 1.7982 |
| 11    | 0.017                              | 0.001 | 0.005   | 0                                | 0         |         | 1.8    |

#### **S-5.4 The role of scale.**

The plant treating 1 kg/s of plastic waste, has been evaluated under a smaller (0.07 kg/s) and a larger (2.1 kg/s), to check if there is any effect on the technologies selected.

However, the technologies selected are the same. The results obtained are presented from Table S-56 to Table S-60 for 0.07 kg/s.

**Table S-56.** Economic and environmental results obtained in the Pareto frontier for a plant processing 0.07 kg/s.

| Point Pareto | Profit (\$/s) | GWP (kgCO <sub>2</sub> eq./s) |
|--------------|---------------|-------------------------------|
| 1            | 0.203         | -0.066                        |
| 2            | 0.193         | -0.08                         |
| 3            | 0.182         | -0.09                         |
| 4            | 0.172         | -0.1                          |
| 5            | 0.161         | -0.106                        |
| 6            | 0.151         | -0.112                        |
| 7            | 0.14          | -0.118                        |
| 8            | 0.129         | -0.124                        |
| 9            | 0.119         | -0.131                        |
| 10           | 0.108         | -0.132                        |

**Table S-57.** Fraction sent to each depolymerization technology for a plant processing 0.07 kg/s.

| Point Pareto | Fraction to solvent-based recycling | Fraction to pyrolysis |
|--------------|-------------------------------------|-----------------------|
| 1            | 0                                   | 1                     |
| 2            | 0                                   | 1                     |
| 3            | 0.129                               | 0.871                 |
| 4            | 0.171                               | 0.829                 |
| 5            | 0.343                               | 0.657                 |
| 6            | 0.528                               | 0.471                 |
| 7            | 0.643                               | 0.357                 |
| 8            | 0.828                               | 0.171                 |
| 9            | 0.9                                 | 0.1                   |
| 10           | 1                                   | 0                     |

**Table S-58.** Detailed description of technologies selected in the points of the Pareto for a plant processing 0.07 kg/s. Syngas employed in hydroformylation is partially covered from gasification where a fraction of plastic waste is suggested to be sent.

| Poi<br>nt | C1    | C2   | C3   | C4               | C5 | C6 | C7 | C8 | >C8  |
|-----------|-------|------|------|------------------|----|----|----|----|------|
| 1         | Power | Isom | Acet | Hydroformylation |    |    |    |    | Olig |



|    |                         |        |                                |                               |                  |      |
|----|-------------------------|--------|--------------------------------|-------------------------------|------------------|------|
|    |                         |        | (53%)<br>Isom<br>(43%)         |                               |                  |      |
| 2  | Power                   | Wacker | Acet<br>(74%)<br>Isom<br>(26%) | Hydroformylation              |                  | Olig |
| 4  | N Gas                   | Isom   | Acet<br>(85%)<br>Isom<br>(15%) | Hydrof<br>(84%) Isom<br>(16%) | Hydroformylation | Olig |
| 5  | N Gas                   | PE     | Acetone                        | Isom                          | Hydroformylation | Olig |
| 6  | N Gas                   | PE     | Acetone                        | Isom                          | Hydroformylation | Olig |
| 7  | N Gas                   | PE     | Acetone                        | Isom                          | Hydroformylation | Olig |
| 8  | N Gas                   | PE     | Acetone                        | Isom                          | Hydroformylation | Olig |
| 9  | N Gas                   | PE     | Acetone                        | Isom (85%)<br>Hydrof<br>(15%) | Hydroformylation | Olig |
| 10 | Solvent-based recycling |        |                                |                               |                  |      |

**Table S-59.** Detailed breakdown of the costs in the points of the Pareto for a plant processing 0.07 kg/s.

| Point | Costs (\$/s) |           |         | Income Products (\$/s) |           |           |       |
|-------|--------------|-----------|---------|------------------------|-----------|-----------|-------|
|       | Utilities    | Raw Mat   | Amortiz | Lubes                  | Aldehydes | Others    | LDPE  |
| 1     | 3.000E-03    | 7.000E-03 | 0.028   | 3.000E-03              | 2.240E-01 | 1.200E-02 | 0     |
| 2     | 3.000E-03    | 6.000E-03 | 0.026   | 3.000E-03              | 2.000E-01 | 2.300E-02 | 0     |
| 3     | 3.000E-03    | 6.000E-03 | 0.023   | 3.000E-03              | 1.690E-01 | 2.350E-02 | 0.016 |
| 4     | 2.000E-03    | 5.000E-03 | 0.022   | 2.500E-03              | 1.290E-01 | 3.400E-02 | 0.021 |
| 5     | 1.722E-03    | 2.723E-03 | 0.018   | 1.200E-03              | 1.020E-01 | 2.700E-02 | 0.042 |

|           |           |           |       |           |           |           |       |
|-----------|-----------|-----------|-------|-----------|-----------|-----------|-------|
| <b>6</b>  | 1.364E-03 | 2.974E-03 | 0.013 | 7.500E-04 | 7.700E-02 | 1.850E-02 | 0.065 |
| <b>7</b>  | 1.089E-03 | 2.000E-03 | 0.010 | 4.500E-04 | 6.100E-02 | 8.500E-03 | 0.079 |
| <b>8</b>  | 5.394E-04 | 2.670E-03 | 0.006 | 1.500E-04 | 2.900E-02 | 4.500E-03 | 0.102 |
| <b>9</b>  | 4.201E-05 | 1.000E-03 | 0.002 | 1.200E-08 | 1.700E-06 | 2.800E-07 | 0.111 |
| <b>10</b> | 4.213E-06 | 8.700E-08 | 0.001 | 0         | 0         | 0         | 0.123 |

**Table S-60.** Detailed breakdown of LCA results in the points of the Pareto for a plant processing 0.07 kg/s.

| Point     | Emissions (kg <sub>CO2eq./S</sub> ) |           |          | Credits (kg <sub>CO2eq./S</sub> ) |           |           |           |
|-----------|-------------------------------------|-----------|----------|-----------------------------------|-----------|-----------|-----------|
|           | Power                               | Heat      | Raw Mat  | Lubes                             | Aldehydes | Others    | LDPE      |
| <b>1</b>  | 1.548E-02                           | 8.475E-03 | 3.20E-02 | 2.340E-03                         | 2.240E-01 | 0.009     | -         |
| <b>2</b>  | 1.531E-02                           | 8.730E-03 | 3.20E-02 | 2.340E-03                         | 2.000E-01 | 0.033     | -         |
| <b>3</b>  | 1.359E-02                           | 7.774E-03 | 2.80E-02 | 2.310E-03                         | 1.690E-01 | 0.037     | 2.527E-04 |
| <b>4</b>  | 1.293E-02                           | 7.571E-03 | 2.20E-02 | 1.170E-03                         | 1.290E-01 | 0.062     | 1.959E-03 |
| <b>5</b>  | 1.046E-02                           | 6.079E-03 | 1.70E-02 | 9.359E-04                         | 1.020E-01 | 0.049     | 1.146E-02 |
| <b>6</b>  | 7.942E-03                           | 4.523E-03 | 1.40E-02 | 5.850E-04                         | 7.700E-02 | 0.033     | 3.340E-02 |
| <b>7</b>  | 6.236E-03                           | 3.335E-03 | 1.30E-02 | 3.510E-04                         | 6.100E-02 | 0.021     | 6.326E-02 |
| <b>8</b>  | 3.558E-03                           | 1.780E-03 | 8.00E-03 | 1.170E-04                         | 2.900E-02 | 0.01      | 9.838E-02 |
| <b>9</b>  | 1.189E-03                           | 3.661E-04 | 3.00E-03 | 9.593E-08                         | 1.900E-06 | 0.1339989 | 1.188E-01 |
| <b>10</b> | 1.189E-03                           | 3.797E-05 | 1.55E-07 | -                                 | -         | -         | 1.320E-   |

|  |  |  |  |  |  |  |    |
|--|--|--|--|--|--|--|----|
|  |  |  |  |  |  |  | 01 |
|--|--|--|--|--|--|--|----|

**S-5.5 Results employing impact on Ecosystems Quality as an indicator.**

Sensitivity analysis was performed to employ a more general indicator that includes other impacts apart from GWP. The results obtained by minimizing the Ecosystems Quality of Recipe are given in Table S-61 to S-63. For all different points in the Pareto front, the same configuration for the economic and environmental objectives are obtained.

**Table S-61.** Economic and environmental results obtained in the Pareto frontier. Maximizing the profit and minimizing the impact on the Ecosystems Quality results in the same value and selects the same technology.

| Point Pareto    | Profit (\$/s) | Impact Ecosystems Quality (Species·y/s) |
|-----------------|---------------|-----------------------------------------|
| Max Profit      | 3.067         | -1.548e-8                               |
| Min Env. Impact | 3.067         | -1.548e-8                               |

**Table S-62.** Detailed description of technologies selected. Note that in all the Pareto, the same selection of technologies is selected.

| Poi<br>nt | C1    | C2   | C3   | C4        | C5 | C6 | C7 | C8 | >C8     |
|-----------|-------|------|------|-----------|----|----|----|----|---------|
| 1         | Power | Isom | Isom | Aldehydes |    |    |    |    | Oligome |
| 2         | Power | Isom | Isom | Aldehydes |    |    |    |    | Oligome |

**Table S-63.** Detailed breakdown of LCA results in the points of the Pareto front when the impact on the ecosystem is minimized as an environmental function. The results are given for one point since the other points

| Point | Impact Ecosystem (Species·y/s) |           |         | Impact Ecosystem (Species·y/s) |           |          |      |
|-------|--------------------------------|-----------|---------|--------------------------------|-----------|----------|------|
|       | Power                          | Heat      | Raw Mat | Lubes                          | Aldehydes | Others   | LDPE |
| 1     | 3.588e-10                      | 9.389e-10 | 2.61e-9 | 2.08-10                        | 1.85e-8   | 6.59e-10 | -    |

**NOMENCLATURE**

|                          |                                                                                                                |
|--------------------------|----------------------------------------------------------------------------------------------------------------|
| $a_{raw\ mat}$           | Parameter employed to determine the raw material consumption from the main raw material in each process block. |
| $a_{util}$               | Parameter employed to determine the utilities consumption from the main raw material in each process block.    |
| $\alpha_z$               | Parameter employed to relate the flux with the capital cost.                                                   |
| $Cap_z$                  | Capital cost of a section of the piecewise linear model.                                                       |
| CAPEX                    | Capital costs.                                                                                                 |
| Costs                    | Summatory of costs involved in the superstructure.                                                             |
| Credits                  | Credits generated by substituting the products from the superstructure.                                        |
| Emissions                | Emissions generated in all the processes.                                                                      |
| $E_{in}$                 | Energy generated by incineration.                                                                              |
| $F_{i,k}$                | Overall mass flow rate between units i and k.                                                                  |
| $f_j$                    | Mass flow rate of a component j.                                                                               |
| $f_{j,k}$                | Mass flow rate of a component j getting into a unit k.                                                         |
| $f_{j,i,k}$              | Mass flow rate of a component j, in a stream between units i and k.                                            |
| $f_{LDPE}$               | Flux of LDPE.                                                                                                  |
| $f_{sep,l}$              | Fraction of material sent to each stream l in a separator.                                                     |
| $GWP_{heat}$             | Global Warming Potential of heat.                                                                              |
| $GWP_j$                  | Global Warming Potential of a component j.                                                                     |
| $GWP_{LDPE}$             | Global Warming Potential of Low density poly-ethylene.                                                         |
| $GWP_{power}$            | Global Warming Potential of power.                                                                             |
| $GWP_{raw,mat}$          | Global Warming Potential of a raw material.                                                                    |
| $GWP_{Ref}$              | Global Warming potential of refrigeration.                                                                     |
| GWP                      | Global Warming Potential.                                                                                      |
| Income                   | Income generated in the superstructure considering all the products.                                           |
| LHV                      | Low Heating value.                                                                                             |
| $N_{Loops}$              | Number of recycling loops.                                                                                     |
| OPEX                     | Operating expenses.                                                                                            |
| $P_{heat}$               | Price of heat.                                                                                                 |
| $P_j$                    | Unitary price of a component.                                                                                  |
| $P_{LDPE\ Virgin}$       | Price of virgin polyethylene.                                                                                  |
| $P_{power}$              | Price of power.                                                                                                |
| $P_{Ref}$                | Price of refrigeration.                                                                                        |
| $Price_{Degraded\ LDPE}$ | Price of degraded LDPE as a function of the number or recycling loops.                                         |
| Profit                   | Overall profit obtained in the system.                                                                         |
| $Q_k$                    | Heat consumption in a process k.                                                                               |
| $Q_{k\ ref}$             | Heat required in refrigeration in a process k.                                                                 |
| Wk                       | Power consumption in a process k.                                                                              |
| $W_{shredder}$           | Power in the shredder.                                                                                         |
| $W_{prod\ incin}$        | Power produced in the incineration process.                                                                    |
| $yield_{react, j}$       | Parameter employed as yield in a product generation from the main reactant.                                    |
| $y_z$                    | Binary variable in each of the cuts of the piecewise linear model.                                             |

|                |                                                               |
|----------------|---------------------------------------------------------------|
| $\alpha_z$     | Alpha variable employed in the piecewise linear model.        |
| $\eta_{incin}$ | Efficiency in the incineration process.                       |
| $\gamma_z$     | Collocation points of the flux in the piecewise linear model. |

### **Subscripts**

|         |                                                |
|---------|------------------------------------------------|
| Heat    | Referred to the heat.                          |
| i       | Set of processes.                              |
| j       | Set of components in a stream.                 |
| k       | Set of processes.                              |
| l       | Set of process alternatives in a separator.    |
| LDPE    | Referred to the low density poly-ethylene.     |
| Power   | Referred to the set of power.                  |
| Raw mat | Referred to the raw material.                  |
| React   | Referred to the main reactant.                 |
| Ref     | Referred to the refrigeration.                 |
| Sep     | Referred to the separators, set of separators. |
| Util    | Referred to the utilities.                     |
| z       | Set of cuts of the piecewise linear model.     |

### **REFERENCES**

1. United States Environmental Protection Agency. LMOP Landfill and Project Database. Available in: <https://www.epa.gov/lmop/lmop-landfill-and-project-database> Last access: 1st February 2023 (2022).
2. Larrain, M. *et al.* Techno-economic assessment of mechanical recycling of challenging post-consumer plastic packaging waste. *Resour Conserv Recycl* **170**, 105607 (2021).
3. Bora, R. R., Wang, R. & You, F. Waste Polypropylene Plastic Recycling toward Climate Change Mitigation and Circular Economy: Energy, Environmental, and Technoeconomic Perspectives. *ACS Sustain Chem Eng* **8**, 16350–16363 (2020).
4. Pavlas, M., Touš, M., Klimek, P. & Bébar, L. Waste incineration with production of clean and reliable energy. *Clean Technol Environ Policy* **13**, 595–605 (2011).
5. Peters, M. S., Timmerhaus, K. D. & West, R. E. *Plant Design and Economics for Chemical Engineers*. (McGraw-Hill, New York, 2002).
6. Rutkaite, R., Bendoraitiene, J., Klimaviciute, R. & Zemaitaitis, A. Cationic starch nanoparticles based on polyelectrolyte complexes. *Int J Biol Macromol* **50**, 687–693 (2012).
7. Alibaba. Plastic Pe Pp Pet Sink Float Separator Washer Washing Tank With Price - Buy Sink Float Separator,Plastic Pe Pp Pet Sink Float Separator Washer Washing Tank With Price Product on Alibaba.com. [https://www.alibaba.com/product-detail/plastic-pe-pp-pet-sink-float\\_60398654917.html](https://www.alibaba.com/product-detail/plastic-pe-pp-pet-sink-float_60398654917.html) (2023).
8. Alibaba. Dewatering Squeezing Pelletzer Machine/plastic Dewatering Screw Press Squeezer Machine/dryer For Plastic Recycling - Buy Dewatering Squeezing Pelletzing Machine,Plastic Dewatering Screw Press Squeezing Machine,Dryer For Plastic Recycling Product on Alibaba.com. [https://www.alibaba.com/product-detail/dewatering-squeezing-pelletzer-machine-plastic-dewatering\\_1600086480959.html?spm=a2700.7724857.normal\\_offer.d\\_title.254d439bjSc669](https://www.alibaba.com/product-detail/dewatering-squeezing-pelletzer-machine-plastic-dewatering_1600086480959.html?spm=a2700.7724857.normal_offer.d_title.254d439bjSc669) (2023).
9. A.M. Gerrard. Guide to Capital Cost Estimating - Institution of Chemical Engineers (Great Britain), Association of Cost Engineers - Google Books.

- [https://books.google.es/books?hl=en&lr=&id=hTuemTrNOrkC&oi=fnd&pg=PA1&dq=six+tenth+rule+cost+estimation&ots=ntVIEgCEST&sig=iSL3h94MToyDRIMG3FR0At20PMc&redir\\_esc=y#v=onepage&q=six%20tenth%20rule%20cost%20estimation&f=false](https://books.google.es/books?hl=en&lr=&id=hTuemTrNOrkC&oi=fnd&pg=PA1&dq=six+tenth+rule+cost+estimation&ots=ntVIEgCEST&sig=iSL3h94MToyDRIMG3FR0At20PMc&redir_esc=y#v=onepage&q=six%20tenth%20rule%20cost%20estimation&f=false) (2000).
10. Lopez, G. *et al.* Recent advances in the gasification of waste plastics. A critical overview. *Renewable and Sustainable Energy Reviews* **82**, 576–596 (2018).
  11. Arena, U., Zaccariello, L. & Mastellone, M. L. Fluidized bed gasification of waste-derived fuels. *Waste Management* **30**, 1212–1219 (2010).
  12. Gaur, U. & Wunderlich, B. Heat capacity and other thermodynamic properties of linear macromolecules. III. Polyoxides ARTICLES YOU MAY BE INTERESTED IN. *J Phys Chem Ref Data* **10**, 1001 (1981).
  13. Chang, S. S. & Bestul, A. B. Heat Capacities of Polyethylene from 2 to 360 K. I. Standard Samples of Linear and Branched Polyethylene Whole Polymer. *JOURNAL OF RESEARCH of the National Bureau of Standards-A. Physics and Chemistry* **77**,.
  14. Splitstone, P. L. & Johnson, W. H. The Enthalpies of Combustion and Formation of Linear Polyethylene. **78**,.
  15. Reddy, S. & Vyas, S. Recovery of Carbon Dioxide and Hydrogen from PSA Tail Gas. *Energy Procedia* **1**, 149–154 (2009).
  16. Roh, H. S., Lee, D. K., Koo, K. Y., Jung, U. H. & Yoon, W. L. Natural gas steam reforming for hydrogen production over metal monolith catalyst with efficient heat-transfer. *Int J Hydrogen Energy* **35**, 1613–1619 (2010).
  17. Hernandez, B. & Martin, M. Optimization for biogas to chemicals via tri-reforming. Analysis of Fischer-Tropsch fuels from biogas. *Energy Convers Manag* **174**, (2018).
  18. Hernández, B. & Martín, M. Optimal production of syngas via super-dry reforming. Analysis for natural gas and biogas under different CO<sub>2</sub> taxes. *Chemical Engineering Research and Design* **148**, 375–392 (2019).
  19. Hernández, B. & Martín, M. Optimal Process Operation for Biogas Reforming to Methanol: Effects of Dry Reforming and Biogas Composition. *Ind Eng Chem Res* **55**, (2016).
  20. Jin, K., Vozka, P., Kilaz, G., Chen, W. T. & Wang, N. H. L. Conversion of polyethylene waste into clean fuels and waxes via hydrothermal processing (HTP). *Fuel* **273**, 117726 (2020).
  21. Liu, S., Kots, P. A., Vance, B. C., Danielson, A. & Vlachos, D. G. Plastic waste to fuels by hydrocracking at mild conditions. *Sci Adv* **7**, 8283–8304 (2021).
  22. Wang, C. *et al.* Polyethylene Hydrogenolysis at Mild Conditions over Ruthenium on Tungstated Zirconia. *J Am Chem Soc* **1**, 1422–1434 (2021).
  23. Hernández, B., Kots, P., Selvam, E., Vlachos, D. G. & Ierapetritou, M. G. Techno-Economic and Life Cycle Analyses of Thermochemical Upcycling Technologies of Low-Density Polyethylene Waste. *ACS Sustain Chem Eng* **11**, 7170–7181 (2023).
  24. Zhao, D., Wang, X., Miller, J. B. & Huber, G. W. The Chemistry and Kinetics of Polyethylene Pyrolysis: A Process to Produce Fuels and Chemicals. *ChemSusChem* **13**, 1764–1774 (2020).
  25. Selvam, E. *et al.* Plastic waste upgrade to olefins via mild slurry microwave pyrolysis over solid acids. *Chemical Engineering Journal* **454**, 140332 (2023).
  26. Hsia Chen, C. S., Heights, B. & Tabak, S. A. PRODUCTION OF LUBRICANT-RANGE HYDROCARBONS FROM LIGHT OLEFINS Inventors: Mobil Oil Corporation, New York.
  27. Knifton, J. F., Sanderson, J. R. & Dai, P. E. Olefin oligomerization via zeolite catalysis. *Catal Letters* **28**, 223–230 (1994).
  28. Kocal, J. A., Vora, B. V. & Imai, T. Production of linear alkylbenzenes. *Appl Catal A Gen* **221**, 295–301 (2001).
  29. Scholtz, H., Ann Desmet, M., Jansen, W., Jacobson, P. & Pablo Fidel, L. Production of linear alkyl benzene. **10**, (2004).

30. Shokri, A. & Karimi, S. A Review in Linear Alkylbenzene (LAB) Production Processes in the Petrochemical Industry. *Russian Journal of Applied Chemistry* **94**, 1546–1559 (2021).
31. PVC Forum South East Europe. A Petrochemical Product - PVC. <http://www.seepvcforum.com/en/content/4-a-petrochemical-product> (2010).
32. ECVM. Vinyl chloride monomer (VCM) production - ECVM. <https://pvc.org/about-pvc/vinyl-chloride-monomer-vcm-production/> (2023).
33. U.S. Department of Health and Human Services. 24/7 Emergency Contact Number: 1-888-295-5156 ACETALDEHYDE What is ACETALDEHYDE? (2023).
34. New Jersey Department of Health and Senior Services. PROPIIONALDEHYDE HAZARD SUMMARY IDENTIFICATION REASON FOR CITATION HOW TO DETERMINE IF YOU ARE BEING EXPOSED WORKPLACE EXPOSURE LIMITS WAYS OF REDUCING EXPOSURE. (1998).
35. Eckert, M., Fleischmann, G., Jira, R., Bolt, H. M. & Golka, K. Acetaldehyde. *Ullmann's Encyclopedia of Industrial Chemistry* (2006) doi:10.1002/14356007.A01\_031.PUB2.
36. Gorbunov, D. N., Terenina, M. V., Kardasheva, Y. S., Maksimov, A. L. & Karakhanov, E. A. Oxo Processes Involving Ethylene (a Review). *Petroleum Chemistry* **57**, 1137–1140 (2017).
37. Murata, K., Matsuda, A. & Masuda, T. Carbonylations with CO/H<sub>2</sub>O and CO/H<sub>2</sub> catalyzed by Co<sub>2</sub>(CO)<sub>8</sub>-1,2-BIS(diphenylphosphino)ethane complexes. *Journal of Molecular Catalysis* **23**, 121–132 (1984).
38. Jenkins, J. M., Jones, R. L., Jones, T. M. & Va, W. Fluidized bed reaction systems. **502**, 457 (1984).
39. Jeremic, D. Polyethylene. *Ullmann's Encyclopedia of Industrial Chemistry* 1–42 (2014) doi:10.1002/14356007.A21\_487.PUB3.
40. Ayaou, B. *et al.* Ethanol Production by catalytic hydration of ethylene.
41. Chemguide. The manufacture of ethanol from ethene. <https://www.chemguide.co.uk/physical/equilibria/ethanol.html> (2002).
42. Propylene and Its Derivatives | CHIYODA CORPORATION. <https://www.chiyodacorp.com/en/service/chemistry/propylene/>.
43. Chempedia. Hydroformylation Union Carbide process - Big Chemical Encyclopedia. [https://chempedia.info/info/union\\_carbide\\_hydroformylation\\_process/](https://chempedia.info/info/union_carbide_hydroformylation_process/) (2019).
44. Herman, J. M., van den Berg, P. J. & Scholten, J. J. F. The industrial hydroformylation of olefins with a rhodium-based supported liquid phase catalyst (SLPC): III. The kinetics of propylene hydroformylation catalyzed by the rhodium-based supported liquid phase catalyst. *The Chemical Engineering Journal* **34**, 123–132 (1987).
45. Wacker Process Can Make Acetone, MEK. *Chemical & Engineering News* **41**, 50–51 (2010).
46. Process for producing acetone. (1985).
47. Theses, R. & Diala, N. STARS STARS Hydration of Propylene to Isopropanol Hydration of Propylene to Isopropanol.
48. Panjapakkul, W. & El-Halwagi, M. M. Technoeconomic Analysis of Alternative Pathways of Isopropanol Production. *ACS Sustain Chem Eng* **6**, 10260–10272 (2018).
49. Onoue, Y., Mizutani, Y., Akiyama, S., Izumi, Y. & Ihara, H. Isopropyl Alcohol by Direct Hydration of Propylene\*.
50. A, D. H. Evaluation on Production and Economics of Acrylonitrile by Sohio Process.
51. Callahan, J. L., Grasselli, R. K., Milberger, E. C. & Strecker, H. A. Oxidation and Ammoxidation of Propylene over Bismuth Molybdate Catalyst. *Industrial and Engineering Chemistry Product Research and Development* **9**, 134–142 (1970).

52. Technology Profile Acrylonitrile Production Propylene synthetic fibers • Polyestertime. <https://www.polyestertime.com/technology-profile-acrylonitrile-production-propylene-synthetic-fibers/>.
53. Acrylic Acid Production via Propylene Oxidation - By Intratec Solutions - Chemical Engineering | Page 1. <https://www.chemengonline.com/acrylic-acid-production-via-propylene-oxidation-intratec-solutions/>.
54. Koch, H., Mawer, R. L. & Immel, W. Polybutenes. *Ullmann's Encyclopedia of Industrial Chemistry* (2011) doi:10.1002/14356007.O21\_O02.
55. Schmidt, R. *et al.* Hydrocarbons. *Ullmann's Encyclopedia of Industrial Chemistry* 1–74 (2014) doi:10.1002/14356007.A13\_227.PUB3.
56. Process for the hydration of mixed butenes to produce mixed alcohols. (2012).
57. Dahlmann, M., Grub, J. & Löser, E. Butadiene. *Ullmann's Encyclopedia of Industrial Chemistry* 1–24 (2011) doi:10.1002/14356007.A04\_431.PUB2.
58. Emulsion polymerized styrene butadiene rubber - Efficiency Finder. [http://wiki.zero-emissions.at/index.php/Emulsion\\_polymerized\\_styrene\\_butadiene\\_rubber](http://wiki.zero-emissions.at/index.php/Emulsion_polymerized_styrene_butadiene_rubber).
59. Kerns. Synthesis of styrene-butadiene rubber. **12**, (2000).
60. Leeuwen, P. W. N. M. van (Piet W. N. M. ) & Claver, Carmen. Hydroformylation of butenes. 284 (2012).
61. Ryan, R. C., Pittman, C. U. & O'Connor, J. P. Metal Cluster Catalysis. 1. Hydroformylations of 1- and 2-Pentene Catalyzed by Two Cobalt Carbonyl Clusters: Co<sub>3</sub>(CO)<sub>9</sub>(μ<sub>3</sub>-CC<sub>6</sub>H<sub>5</sub>) and Co<sub>4</sub>(CO)<sub>8</sub>(μ<sub>2</sub>-CO)<sub>2</sub>(μ<sub>4</sub>-PC<sub>6</sub>H<sub>5</sub>)<sub>2</sub>. *J Am Chem Soc* **99**, 1986–1988 (1977).
62. Pruet, R. L., Smith, J. A. & Va, W. Hydroformylation process. (1967) doi:10.5/1.
63. Breuil. Method of separating pentene-2 from a c5 cut containing pentene-2 and pentene-1 by selective oligomerization of pentene-1. (2012).
64. Gerster, J. A., Gorton, J. A. & Eklund, R. B. Selective Solvents for Separation of n-Pentane from 1-Pentene by Extractive Distillation. *J Chem Eng Data* **5**, 423–429 (1960).
65. Falbe, J., Bahrmann, H., Lipps, W. & Mayer, D. Alcohols, Aliphatic. *Ullmann's Encyclopedia of Industrial Chemistry* (2000) doi:10.1002/14356007.A01\_279.
66. Walker, T. W. *et al.* Recycling of multilayer plastic packaging materials by solvent-targeted recovery and precipitation. *Sci Adv* **6**, eaba7599 (2020).
67. Jenkins, J. Chemical Engineering Plant Cost Index Annual Average. *Chemical Engineering: Essentials for the CPI Professional* (2020).
68. US- EIA. United States Natural Gas Industrial Prices. Available in: <https://www.eia.gov/dnav/ng/hist/n3035us3m.htm>. January 2022 (2022).
69. Energy Information Administration. Average Price of Electricity to Ultimate Customers by End-Use Sector. Available in: [https://www.eia.gov/electricity/monthly/epm\\_table\\_grapher.php?t=epmt\\_5\\_6\\_a](https://www.eia.gov/electricity/monthly/epm_table_grapher.php?t=epmt_5_6_a). Accessed January 2022 (2022).
70. U.S. Department of Energy. Water and Wastewater Annual Price Escalation Rates for Selected Cities across the United States. (2017).
71. Chemanalyst. Caustic Soda Prices, Price, Pricing, Monitor | ChemAnalyst. <https://www.chemanalyst.com/Pricing-data/caustic-soda-3> (2023).
72. Selina Wamucii. Maize starch Price in US - July 2023 Market Prices (Updated Daily). <https://www.selinawamucii.com/insights/prices/united-states-of-america/maize-starch/> (2023).
73. Chemanalyst. Low Density Polyethylene (LDPE) Prices, News, Monitor| ChemAnalyst. <https://www.chemanalyst.com/Pricing-data/low-density-polyethylene-ldpe-24> (2023).
74. U.S. Energy Information Administration. Residential Propane Weekly Heating Oil and Propane Prices (October - March). [https://www.eia.gov/dnav/pet/pet\\_pri\\_wfr\\_a\\_EPLLPA\\_PRS\\_dpgal\\_w.htm](https://www.eia.gov/dnav/pet/pet_pri_wfr_a_EPLLPA_PRS_dpgal_w.htm) (2023).



75. US EIA. Gasoline and Diesel Fuel Update. Available in: <https://www.eia.gov/petroleum/gasdiesel/> Accessed January 2022.
76. Airnav. Fuel price report. Type Jet A. Available in: <https://www.airnav.com/fuel/report.html>. Accessed February 2022 (2022).
77. IEA. The Future of Hydrogen – Analysis - IEA. <https://www.iea.org/reports/the-future-of-hydrogen>.
78. Methanex. Pricing - Methanex | Methanex. <https://www.methanex.com/about-methanol/pricing/>.
79. Lubes'n'Greases. EMEA Base Oil Price Report - Lubes'N'Greases. [https://www.lubesngreases.com/bor-emea/5\\_9/emea-base-oil-price-report-18/](https://www.lubesngreases.com/bor-emea/5_9/emea-base-oil-price-report-18/).
80. Chemanalyst. Linear Alkyl Benzene (LAB) Prices, News, Monitor | ChemAnalyst. <https://www.chemanalyst.com/Pricing-data/linear-alkyl-benzene-lab-14>.
81. Chemanalyst. Acetaldehyde Prices, Pricing, News, Monitor | ChemAnalyst. <https://www.chemanalyst.com/Pricing-data/acetaldehyde-1124>.
82. Chemanalyst. Ethanol Prices, Price, Pricing, Monitor | ChemAnalyst. <https://www.chemanalyst.com/Pricing-data/ethanol-13>.
83. Chemanalyst. Ethylene Oxide (EO) Prices, News, Monitor | ChemAnalyst. <https://www.chemanalyst.com/Pricing-data/ethylene-oxide-1102>.
84. Chemanalyst. Polypropylene (PP) Prices, Price, Pricing, News, Monitor | ChemAnalyst. <https://www.chemanalyst.com/Pricing-data/polypropylene-10>.
85. Chemanalyst. Butyraldehyde Prices | News | Monitor | Market Analysis | ChemAnalyst. <https://www.chemanalyst.com/Pricing-data/butyraldehyde-1300>.
86. Chemanalyst. Acetone Prices, Price, Pricing, News, Monitor | ChemAnalyst. <https://www.chemanalyst.com/Pricing-data/acetone-12>.
87. Chemanalyst. Isopropyl alcohol (IPA) Prices, News, Monitor | ChemAnalyst. <https://www.chemanalyst.com/Pricing-data/isopropyl-alcohol-31>.
88. Chemanalyst. Acrylonitrile Price, Prices, Pricing, Monitor | ChemAnalyst. <https://www.chemanalyst.com/Pricing-data/acrylonitrile-33>.
89. Crump, E. L. Economic Impact Analysis For the Proposed Cyanide Manufacturing NESHAP. (2000).
90. Federal Reserve Bank of Minneapolis. Consumer Price Index, 1913- | Federal Reserve Bank of Minneapolis. <https://www.minneapolisfed.org/about-us/monetary-policy/inflation-calculator/consumer-price-index-1913->.
91. Chemanalyst. Acrylic Acid Prices, News, Monitor | ChemAnalyst. <https://www.chemanalyst.com/Pricing-data/acrylic-acid-20>.
92. Chemanalyst. Polyisobutylene Prices, Price, Pricing, News, Monitor | ChemAnalyst. <https://www.chemanalyst.com/Pricing-data/polyisobutylene-1294>.
93. Chemanalyst. N-Butanol (NBA) Pricing, Prices, Price, News, Monitor | ChemAnalyst. <https://www.chemanalyst.com/Pricing-data/n-butanol-78>.
94. Chemanalyst. Styrene Prices, Price, Pricing, Monitor | ChemAnalyst. <https://www.chemanalyst.com/Pricing-data/styrene-38>.
95. Aldehydes Cyclic Polymers Price in Italy - 2023 - Charts and Tables - IndexBox. <https://www.indexbox.io/search/aldehydes-cyclic-polymers-price-italy/>.
96. Alibaba. aldehyde alcohol Chemicals - Alibaba.com. <https://www.alibaba.com/showroom/aldehyde-alcohol.html>.
97. Chemanalyst. N-Hexane Prices, News, Market Analysis, Monitor | ChemAnalyst. <https://www.chemanalyst.com/Pricing-data/n-hexane-1151>.
98. Chemanalyst. N-Heptane Prices, News, Monitor, Market Analysis | ChemAnalyst. <https://www.chemanalyst.com/Pricing-data/n-heptane-1152>.
99. Chemanalyst. Benzene Prices, Price, Pricing, News, Monitor | ChemAnalyst. <https://www.chemanalyst.com/Pricing-data/benzene-25>.
100. Chemanalyst. Ammonia Price, Prices, Pricing, Monitor | ChemAnalyst. <https://www.chemanalyst.com/Pricing-data/ammonia-37>.
101. High Volume Oxygen. High Volume Oxygen -- How much does oxygen cost? <https://highvolumeoxygen.com/how-much-does-oxygen-cost/> (2023).

102. Alwan, N. T., Shcheklein, S. E. & Ali, O. M. Evaluation of distilled water quality and production costs from a modified solar still integrated with an outdoor solar water heater. *Case Studies in Thermal Engineering* **27**, 101216 (2021).
103. Goedkoop, M., Heijungs, R., De Schryver, A., Struijs, J. & Van Zelm, R. ReCiPe 2008 A life cycle impact assessment method which comprises harmonised category indicators at the midpoint and the endpoint level. *ReCiPe 2008* (2013).
104. OECD. The current plastics lifecycle is far from circular. <https://www.oecd.org/environment/plastics/plastics-lifecycle-is-far-from-circular.htm> (2020).
